# Supplementary material for: The Spin–Orbit Effect on the Electronic Structures, Refractive Indices, and Birefringence of X2PO4I (X = Pb, Sn, Ba and Sr): A First-Principles Investigation
Source: MDPI journal article supplement (doi:10.3390/nano14070617), 2024-04-01

## Supplementary Materials

# The Spin–Orbit Effect on the Electronic Structures, Refractive Indices, and Birefringence of $X_2PO_4I$ ( $X = Pb, Sn, Ba$ and $Sr$ ): A First-Principles Investigation

Xudong Leng <sup>†</sup>, Mei Hu <sup>†</sup>, Qun Jing <sup>\*</sup>, Haiming Duan, Henglei Chen and Xiuhua Cui <sup>\*</sup>

Xinjiang Key Laboratory of Solid State Physics and Devices, School of Physical Science and Technology,

Xinjiang University, Urumqi 830017, China; chillsir@stu.xju.edu.cn (X.L.); humei09292022@163.com (M.H.); dhm@xju.edu.cn (H.D.); chl@xju.edu.cn (H.C.)

<sup>\*</sup> Correspondence: qunjing@xju.edu.cn (Q.J.); xjcxh0991@xju.edu.cn (X.C.)

<sup>†</sup> These authors contributed equally to this work.

Figure S1. The band structure of  $\text{Pb}_2\text{PO}_4\text{I}$  without spin-orbit effects and with spin-orbit effects, within the energy range of -20 eV to 10 eV.

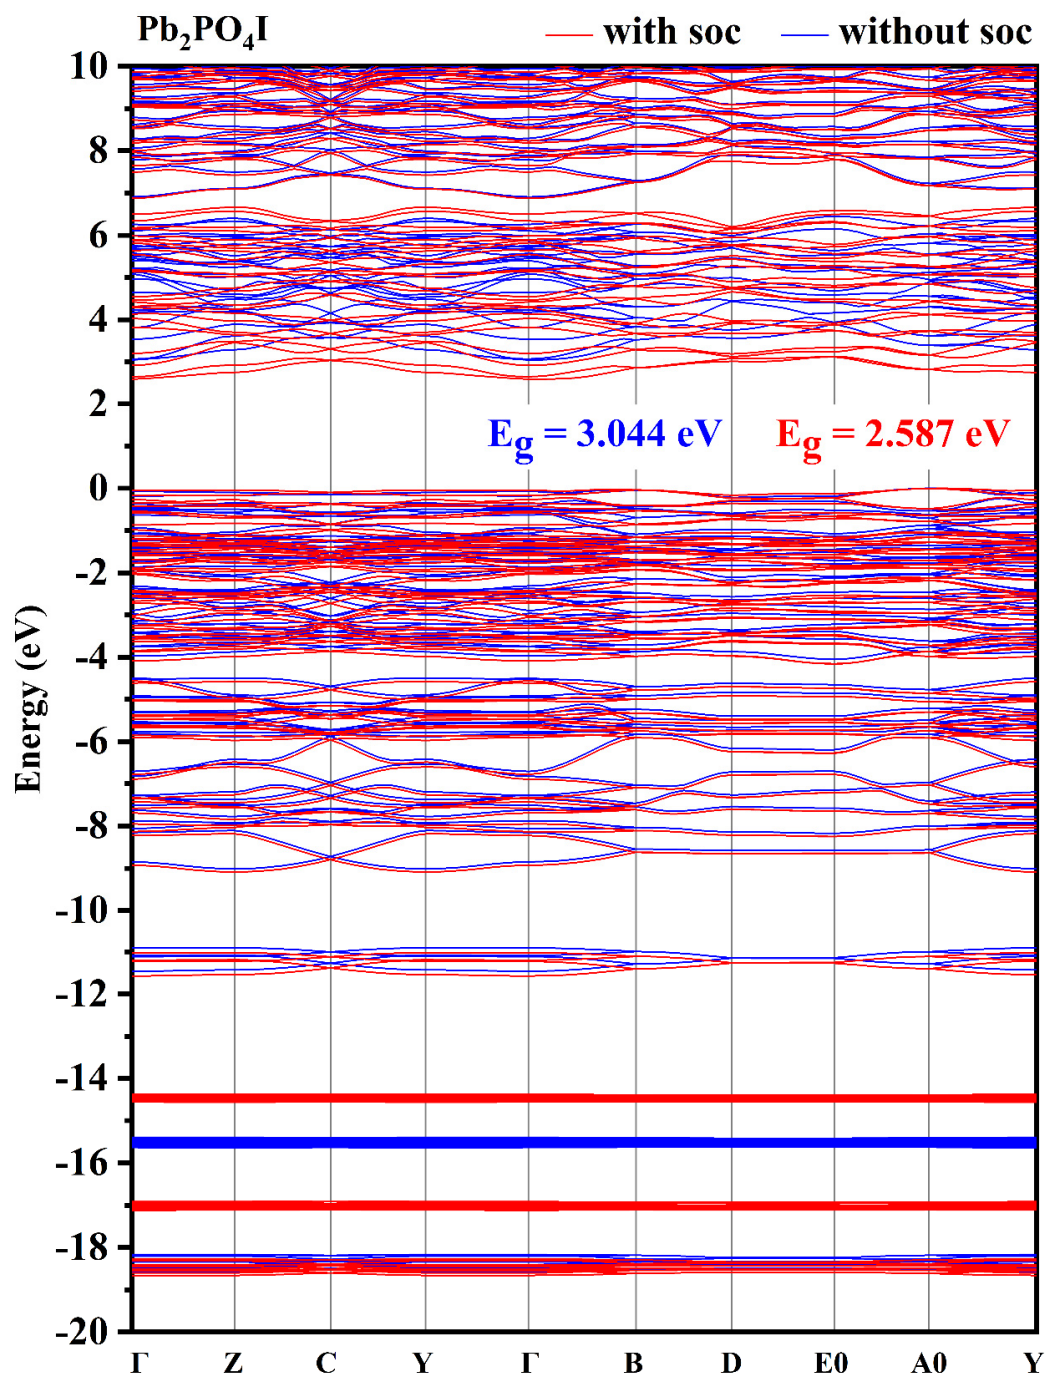

Figure S2. The projected band structure of  $\text{Pb}_2\text{PO}_4\text{I}$  along symmetry directions in the first Brillouin zone without (left panel) and with (right panel) spin-orbit effects.

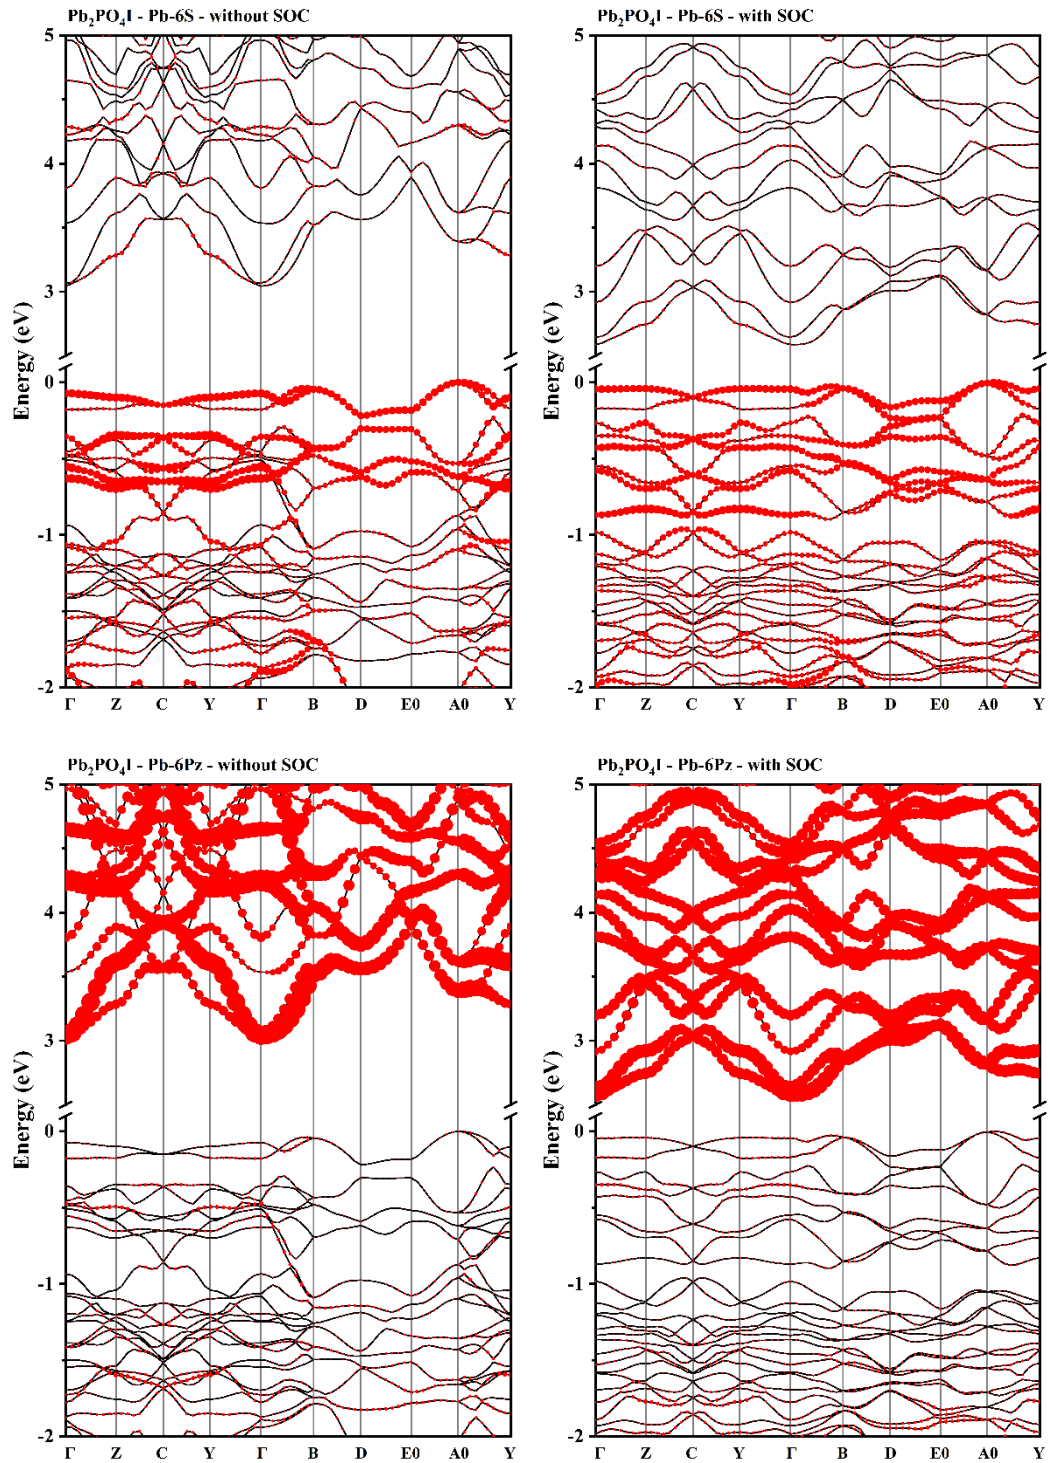

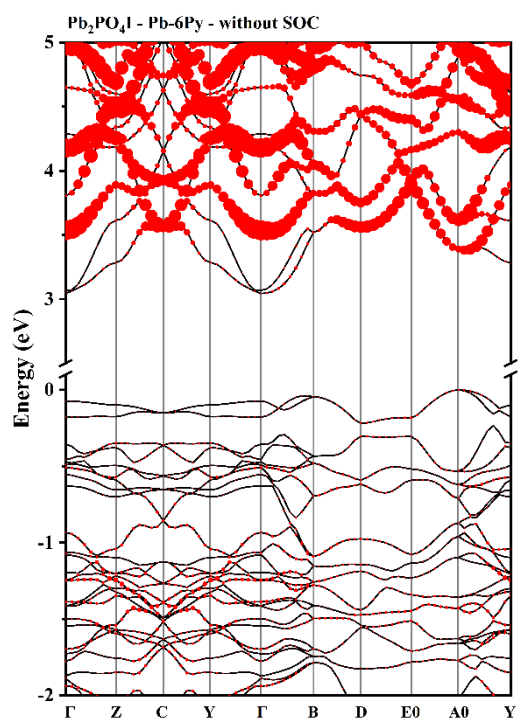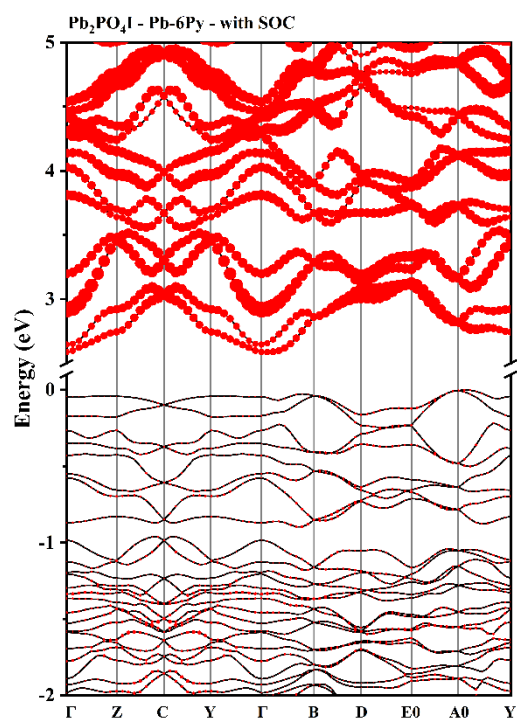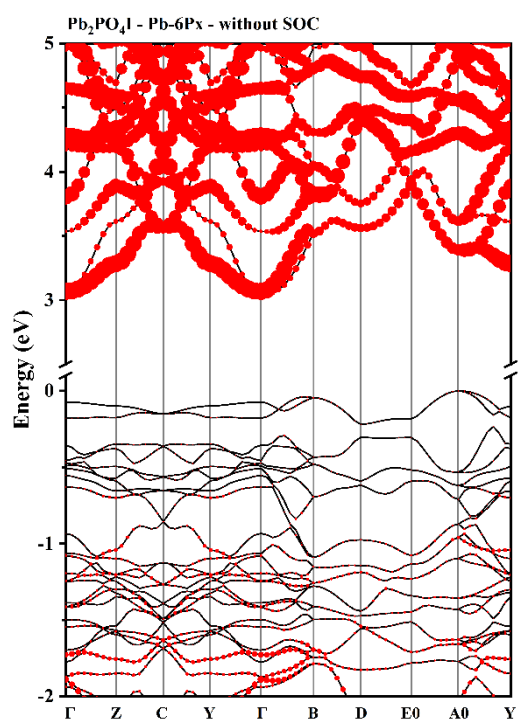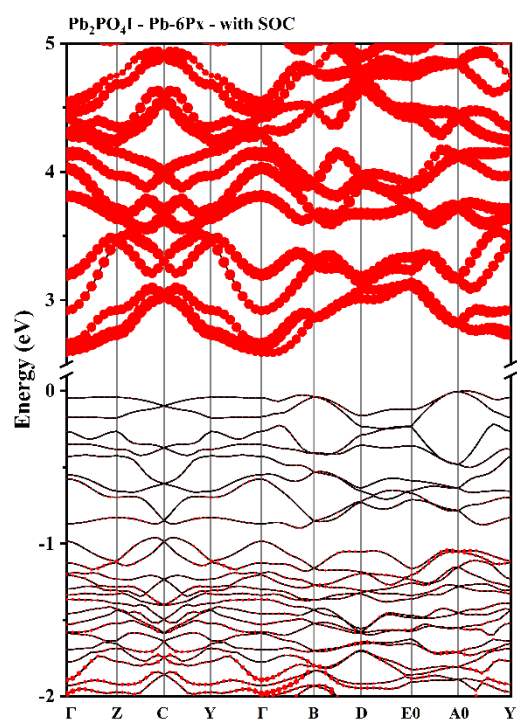



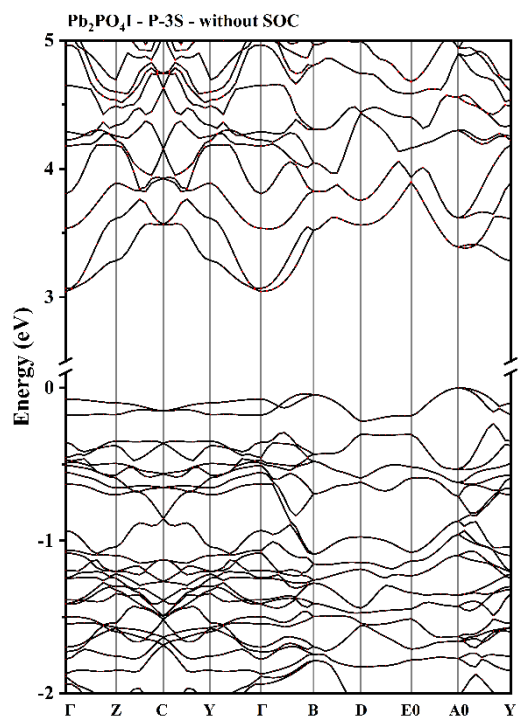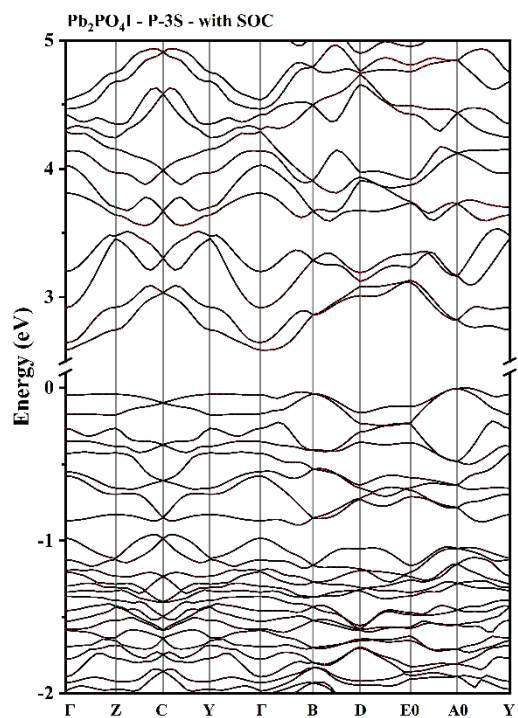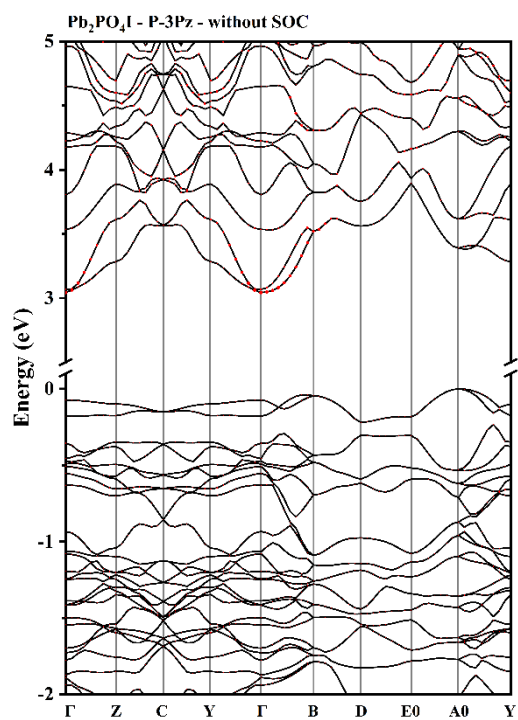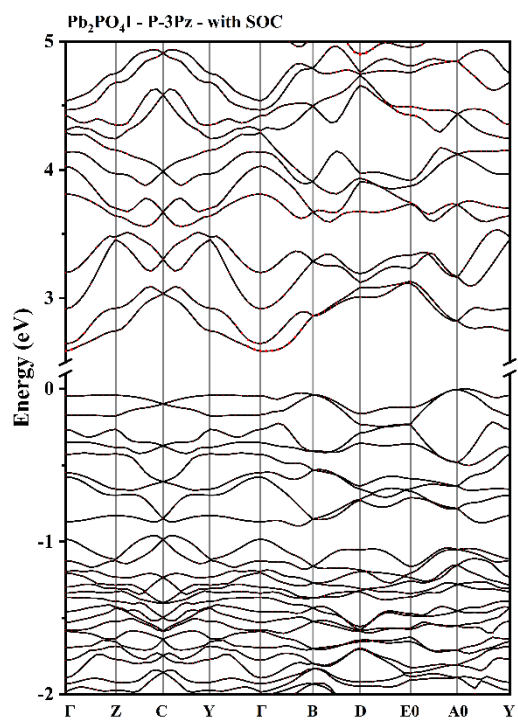

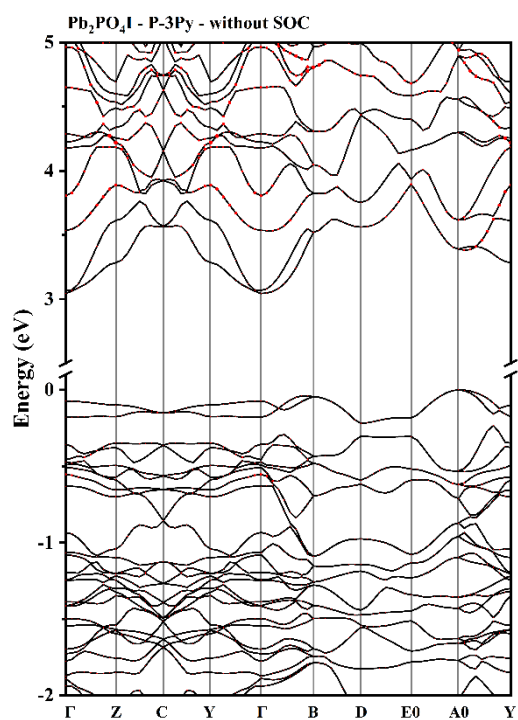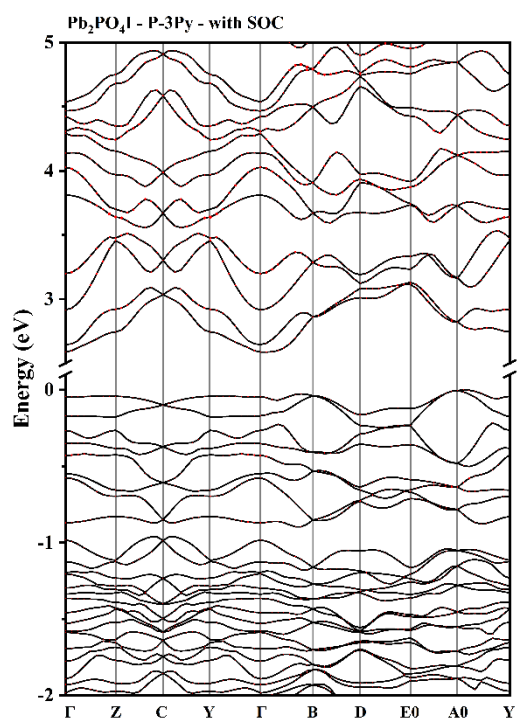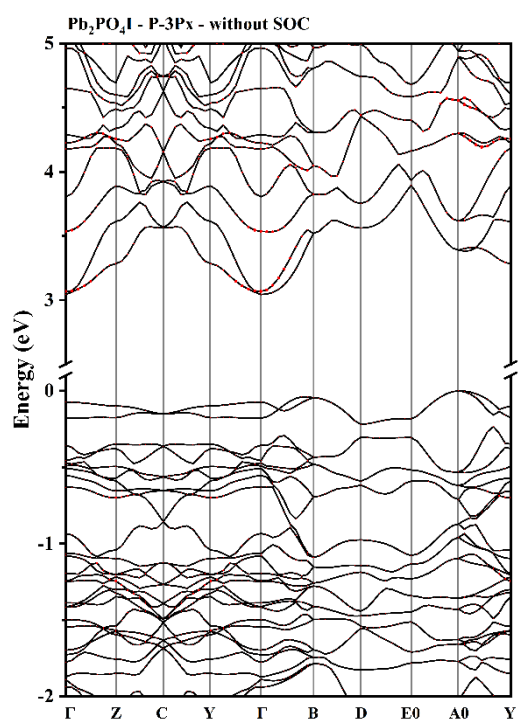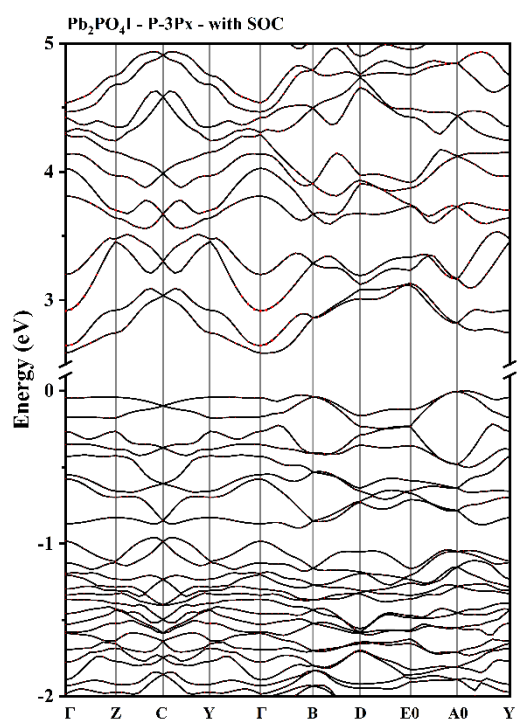

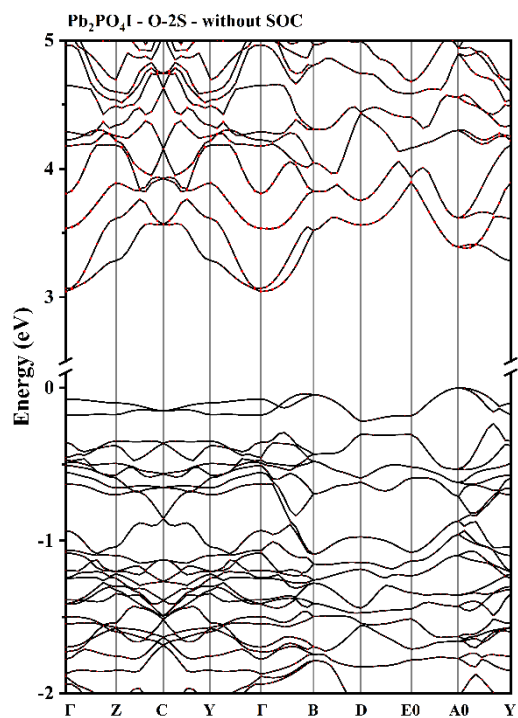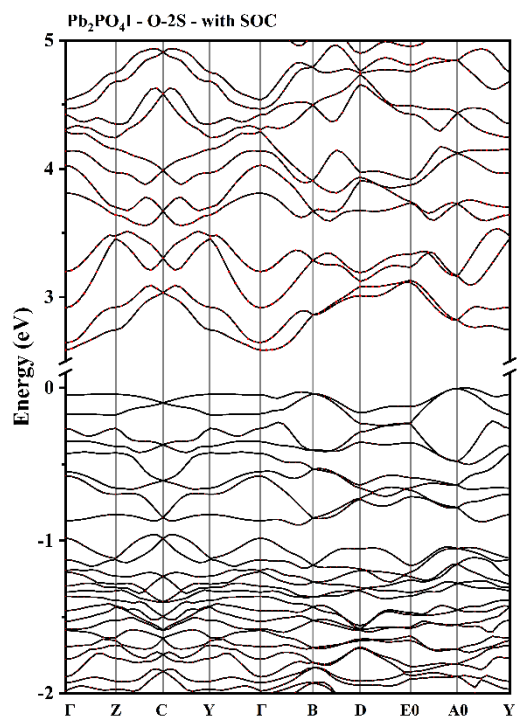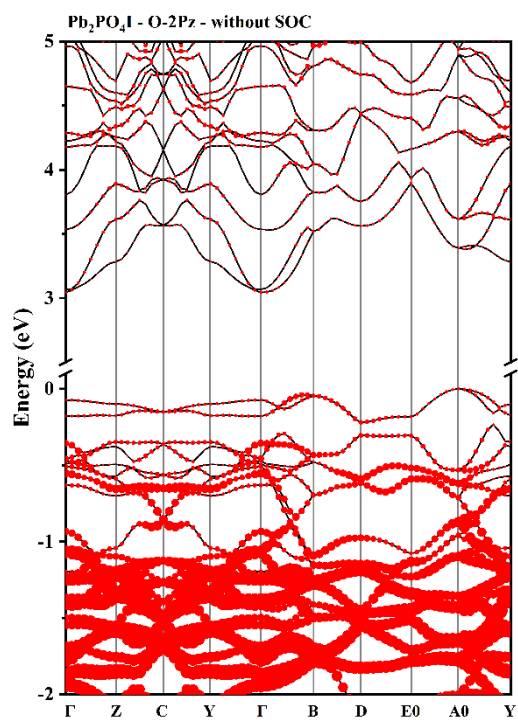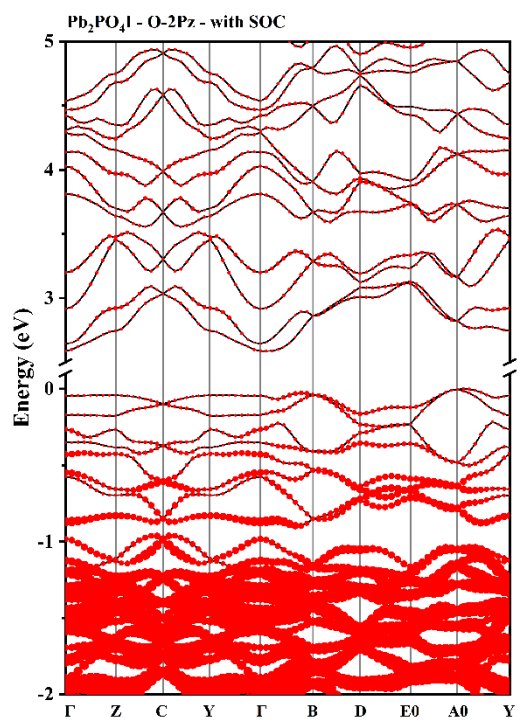

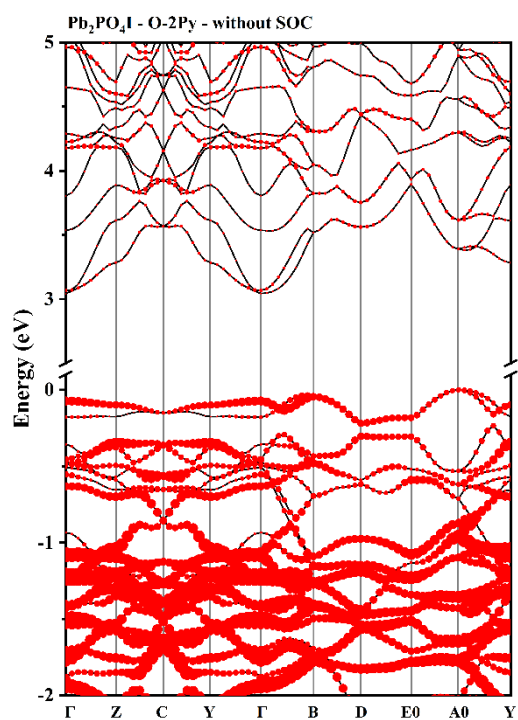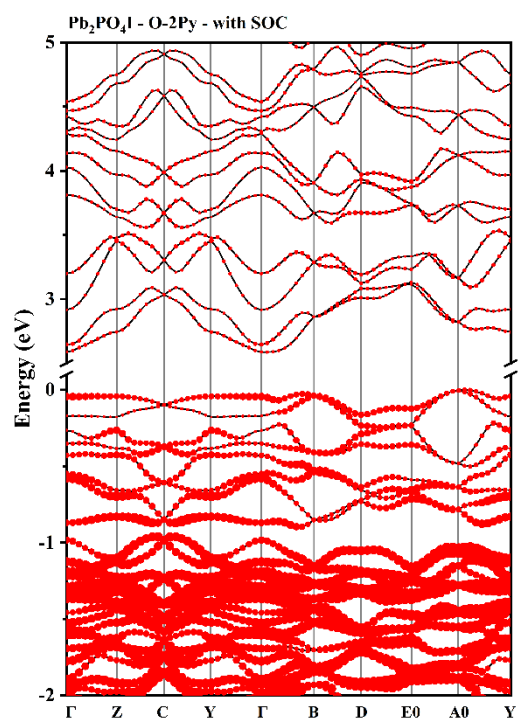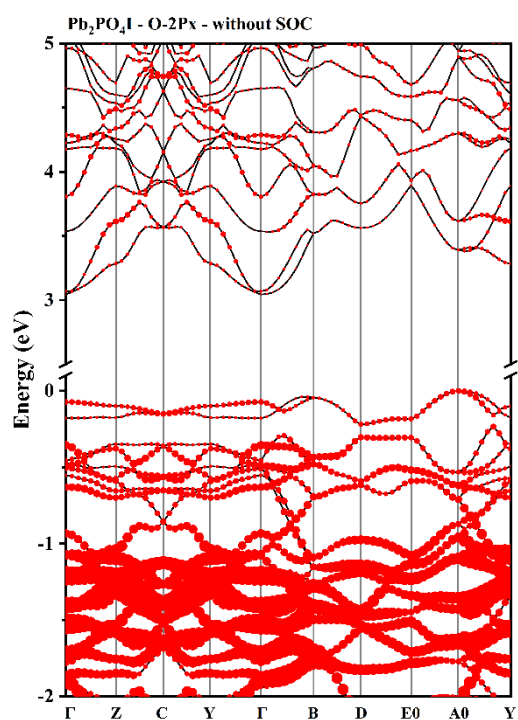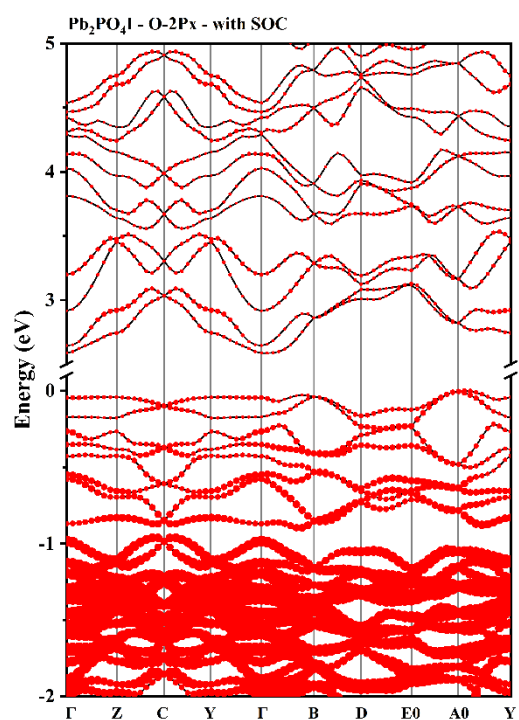

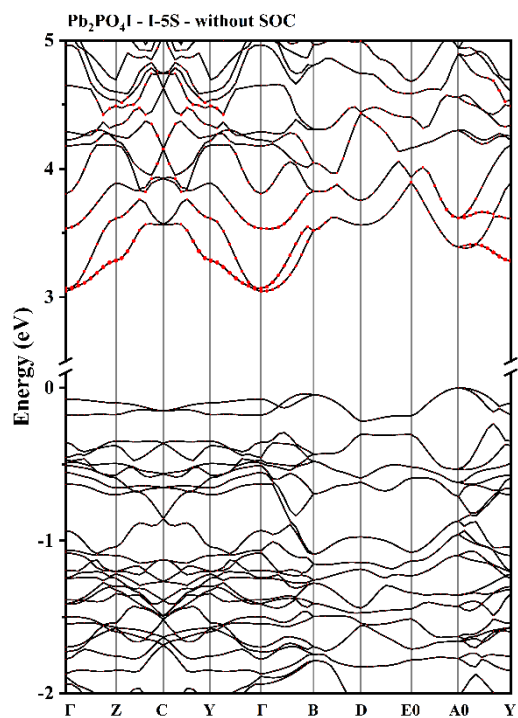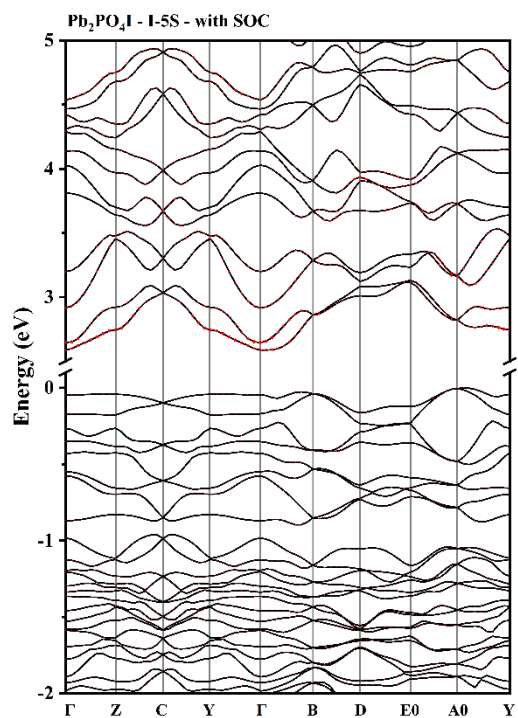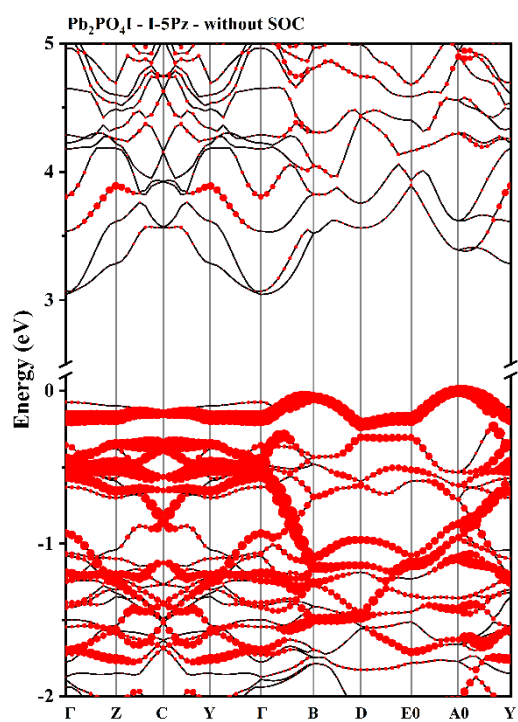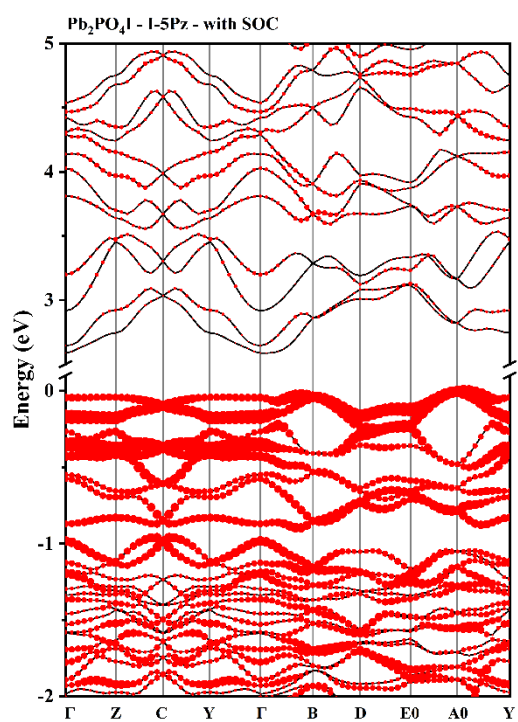



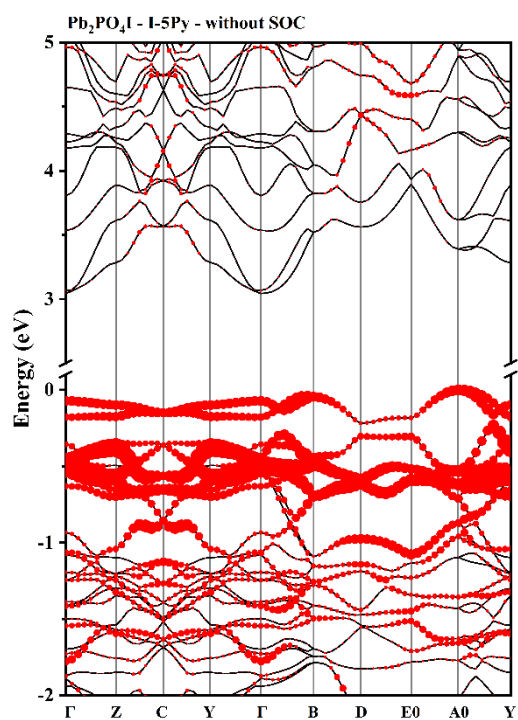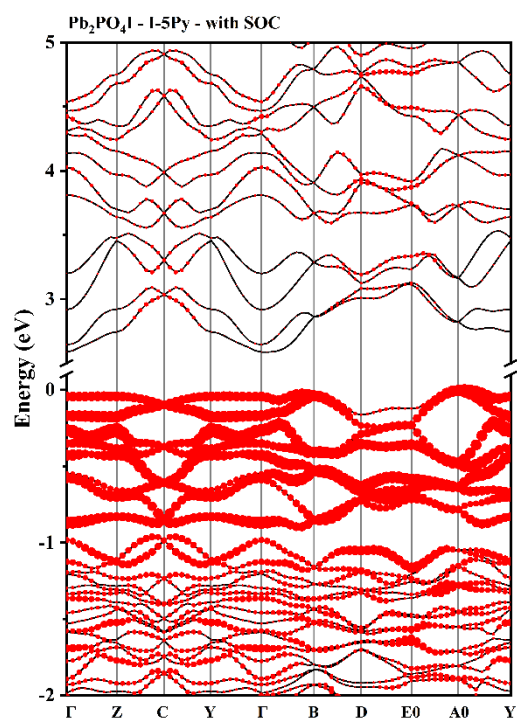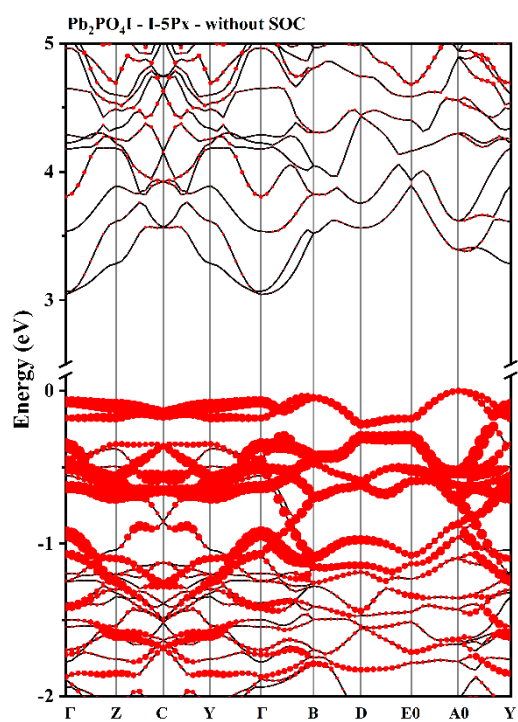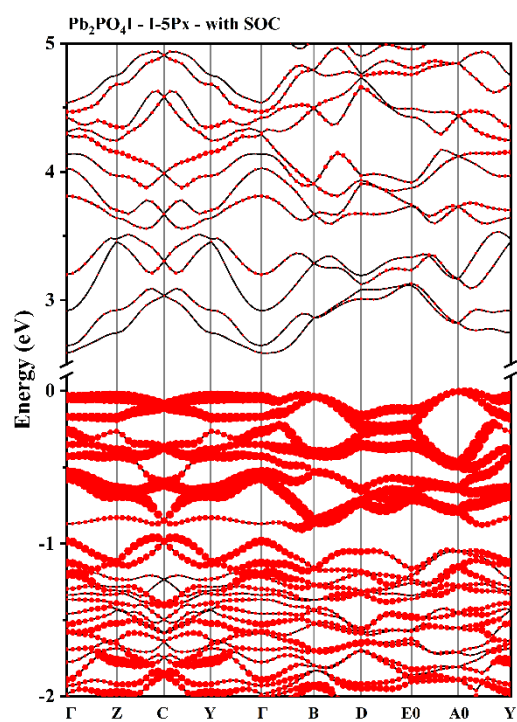



Figure S3. The band structure of  $\text{Sn}_2\text{PO}_4\text{I}$  without spin-orbit effects and with spin-orbit effects, within the energy range of -20 eV to 10 eV.

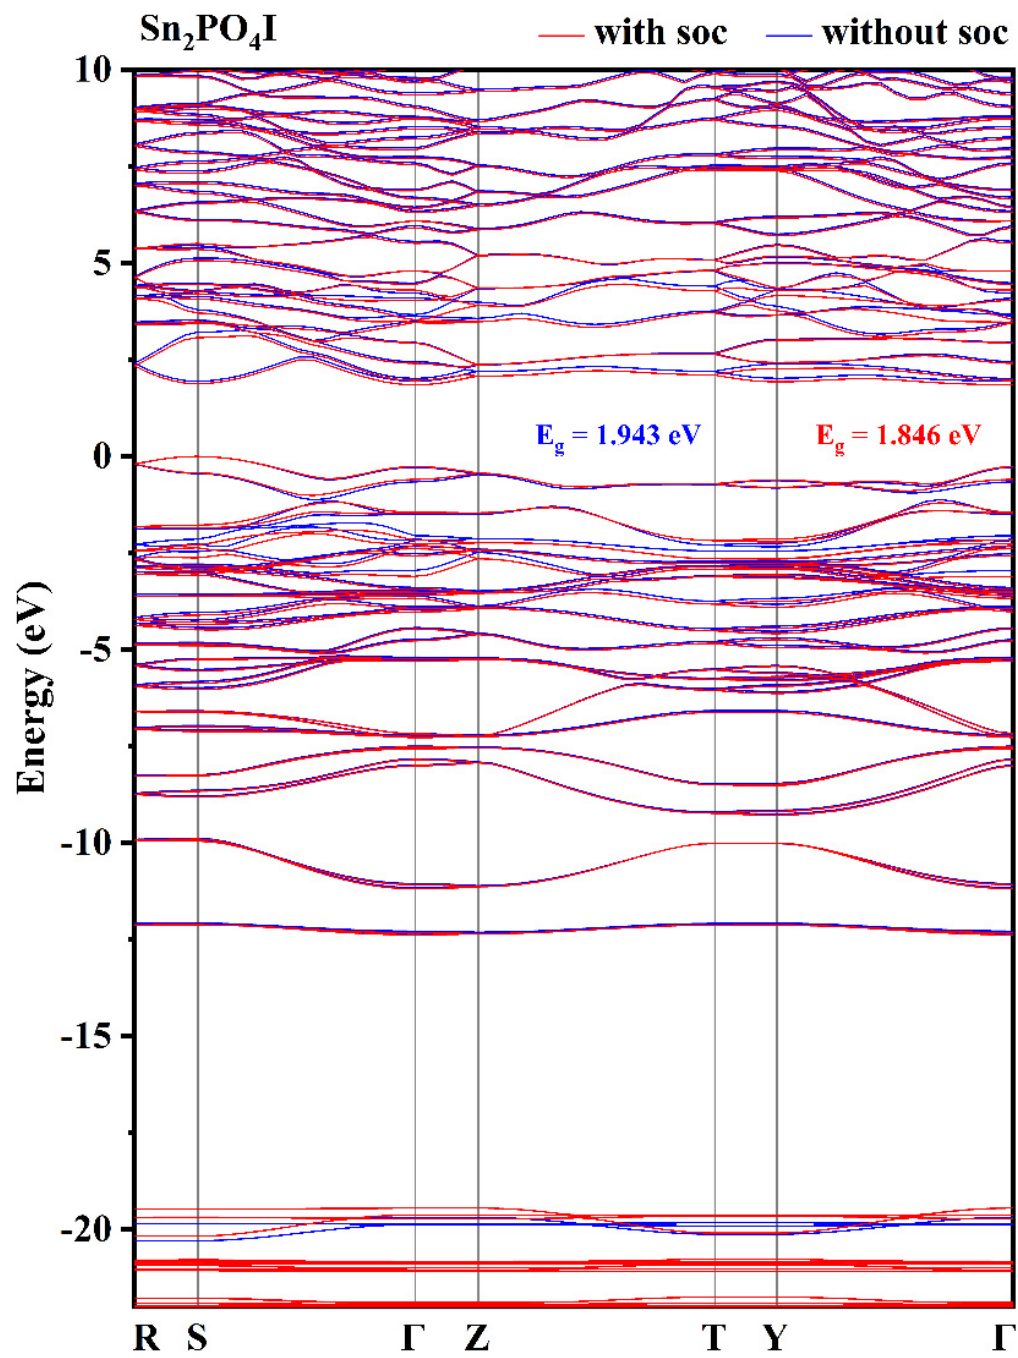

Figure S4. The projected band structure of  $\text{Sn}_2\text{PO}_4\text{I}$  along symmetry directions in the first Brillouin zone without (left panel) and with (right panel) spin-orbit effects.

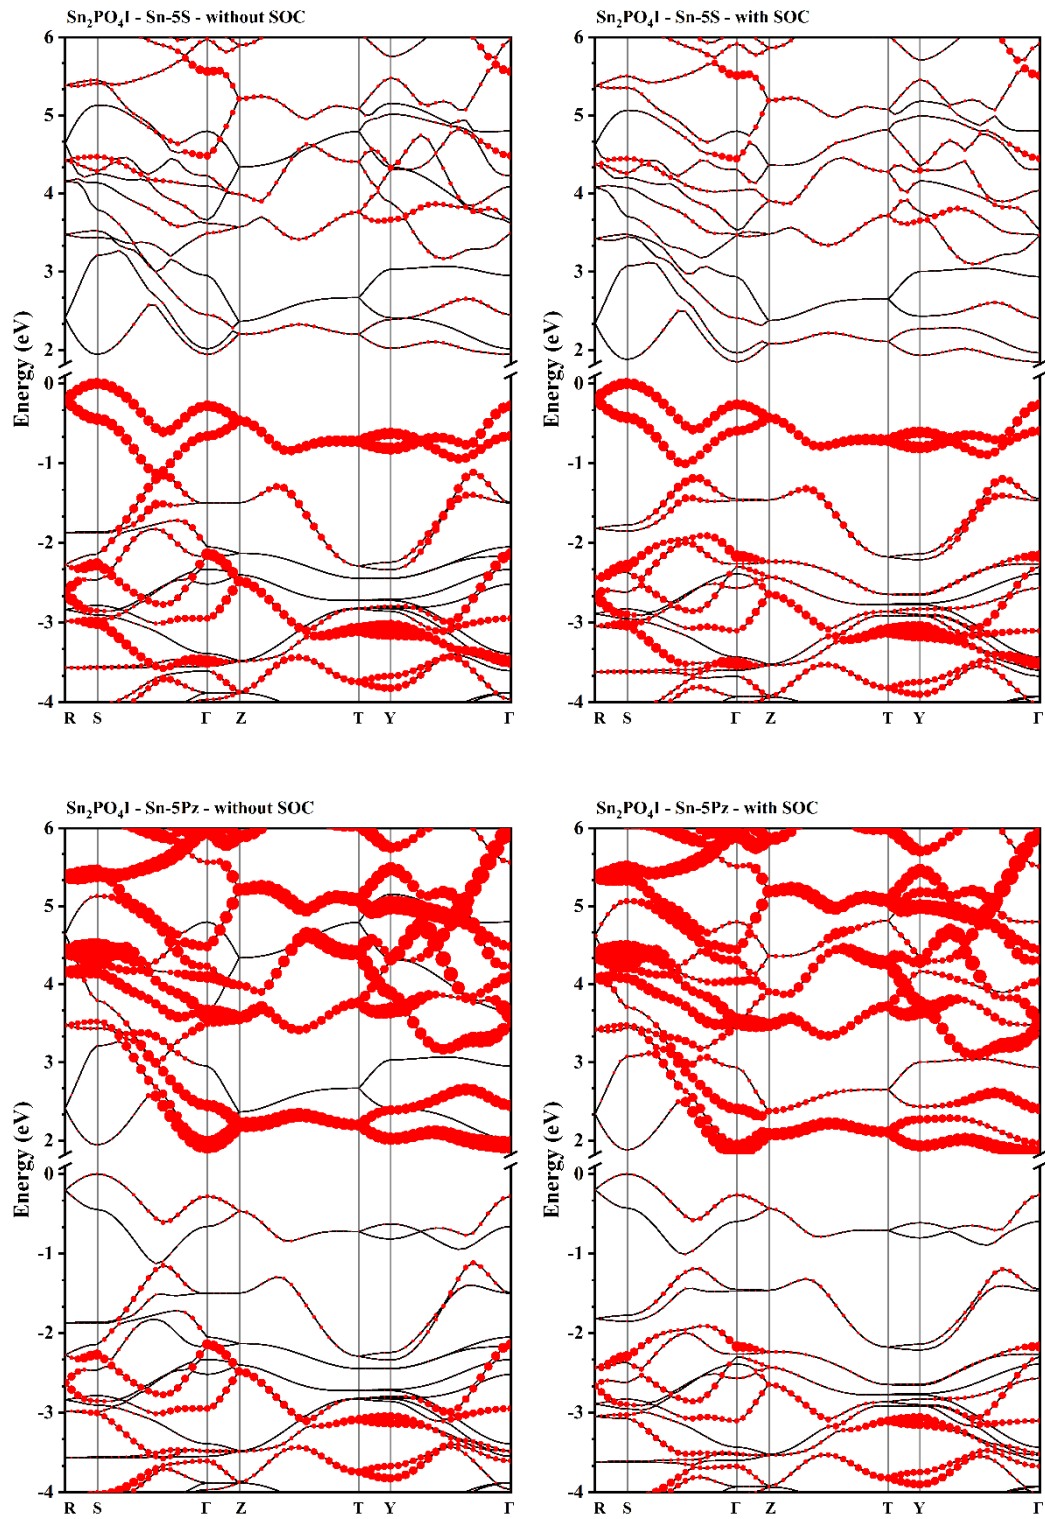

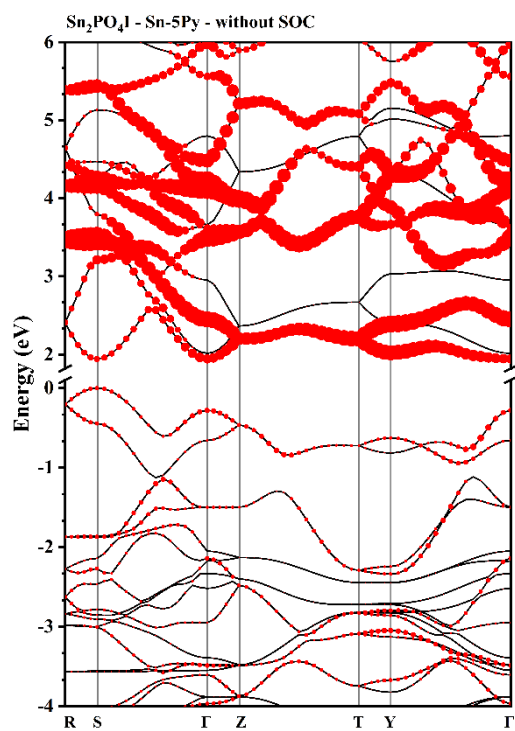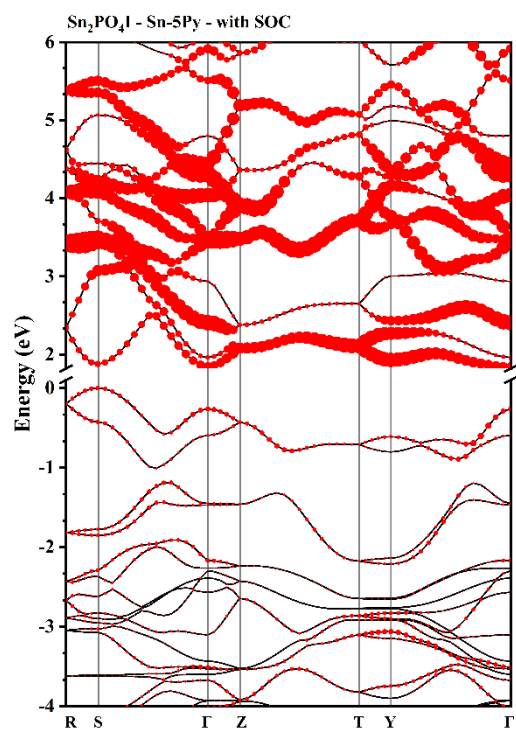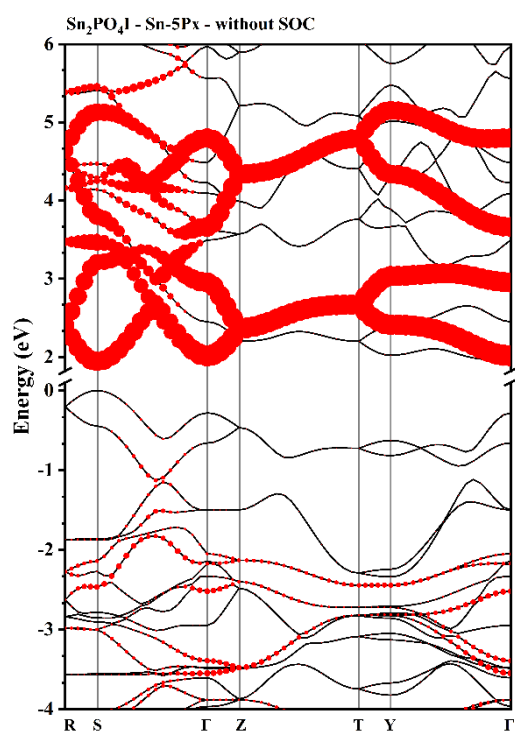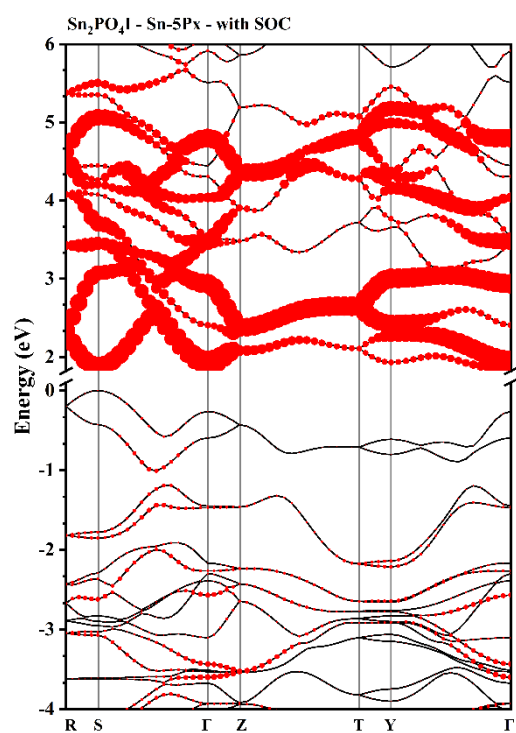

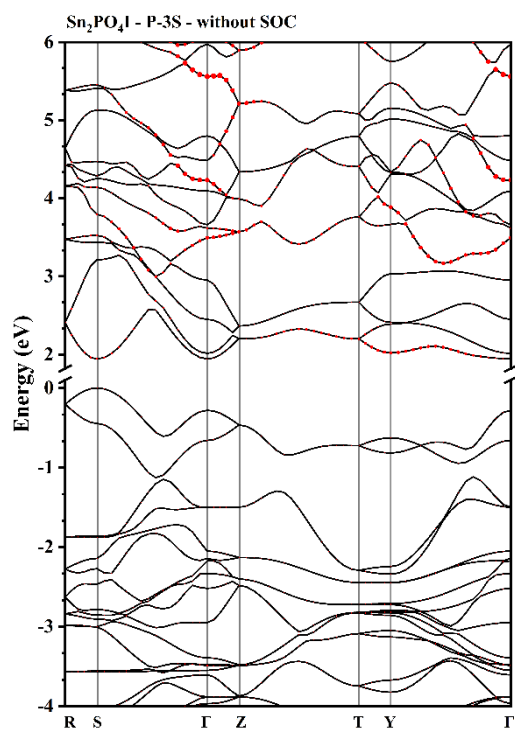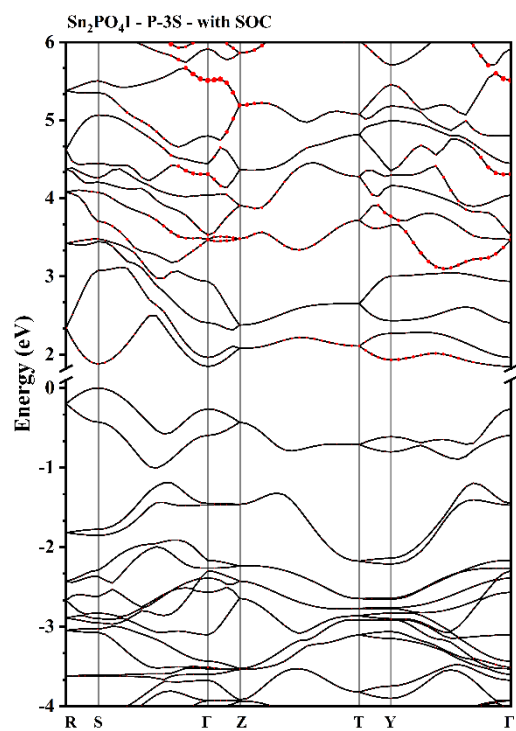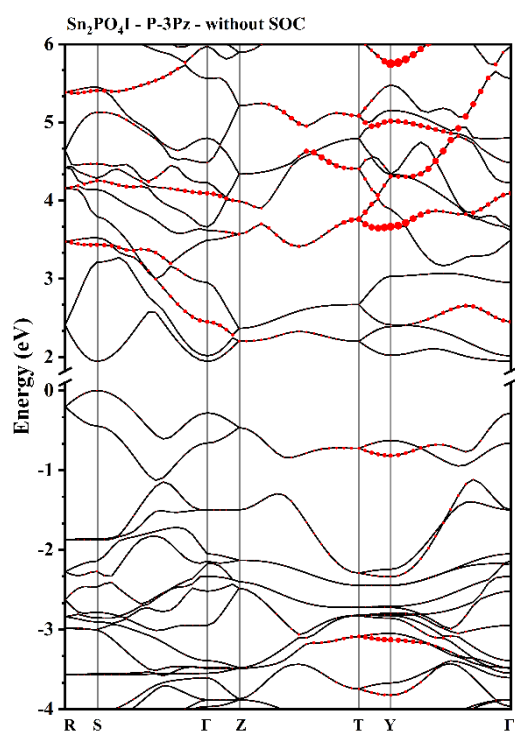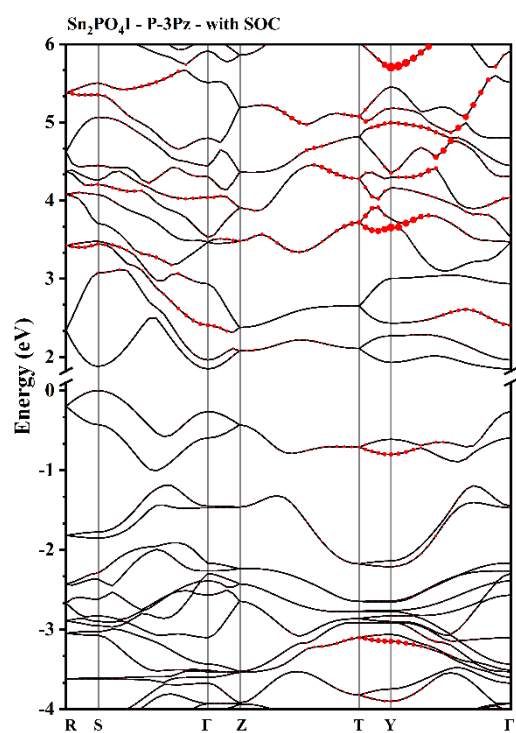

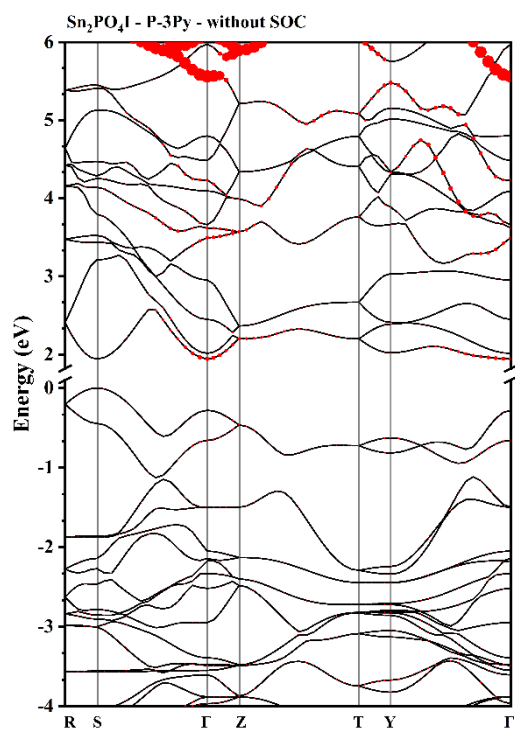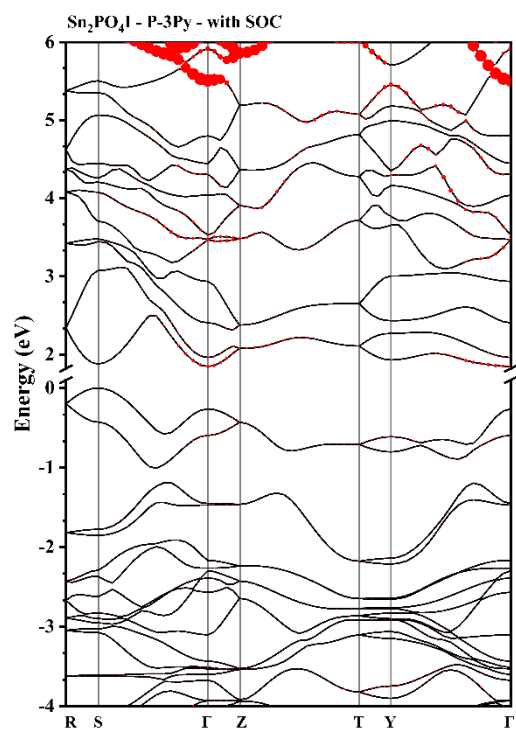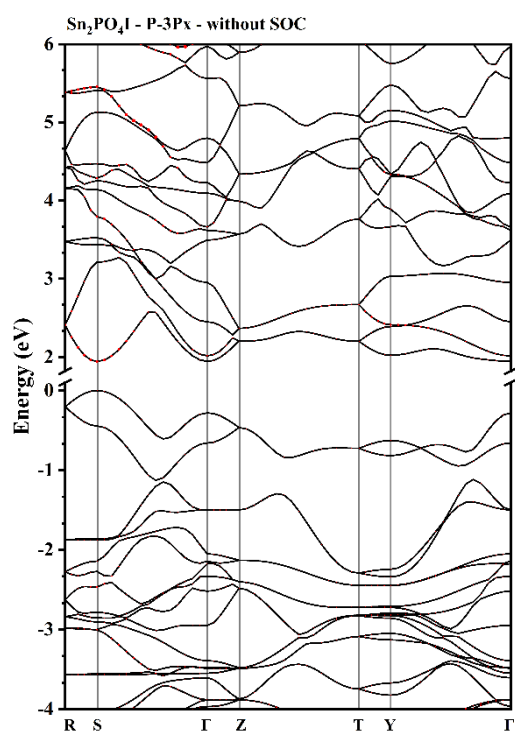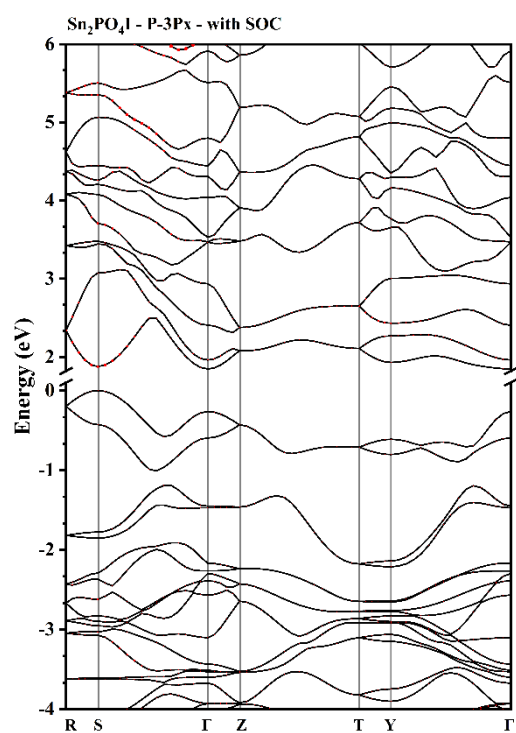

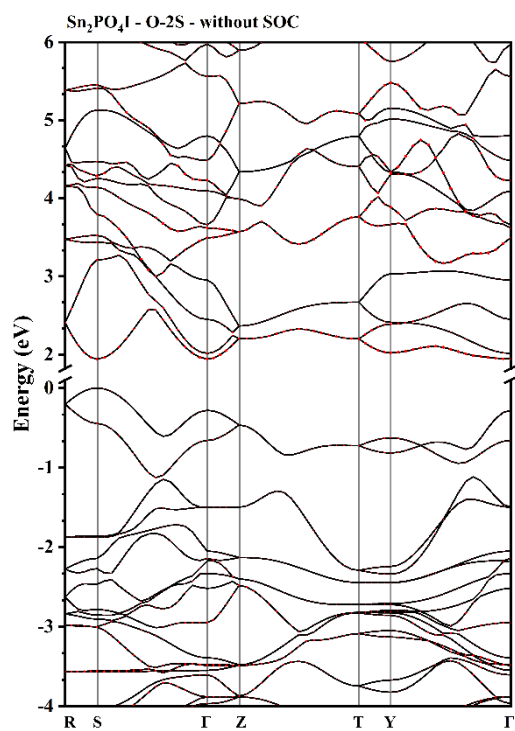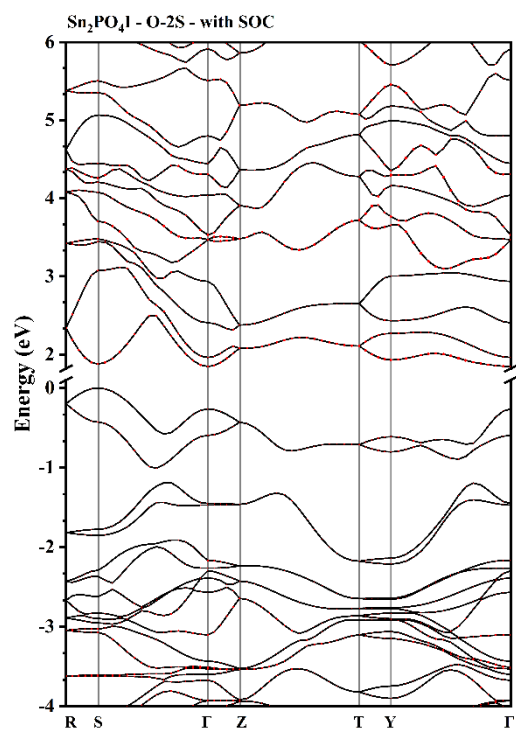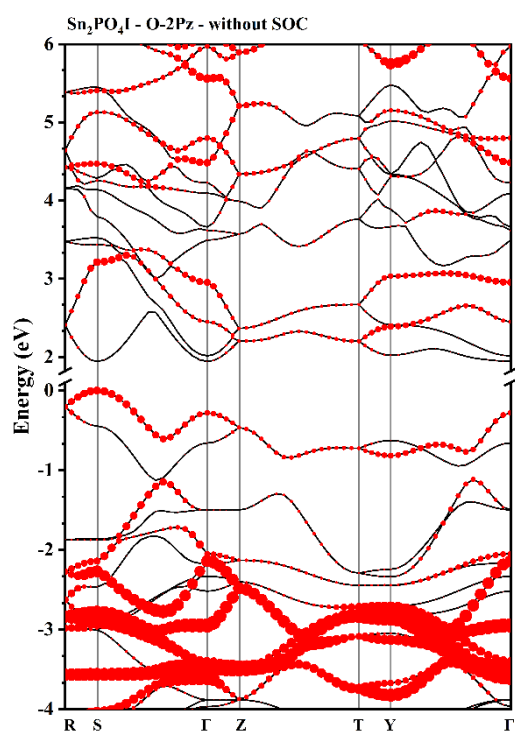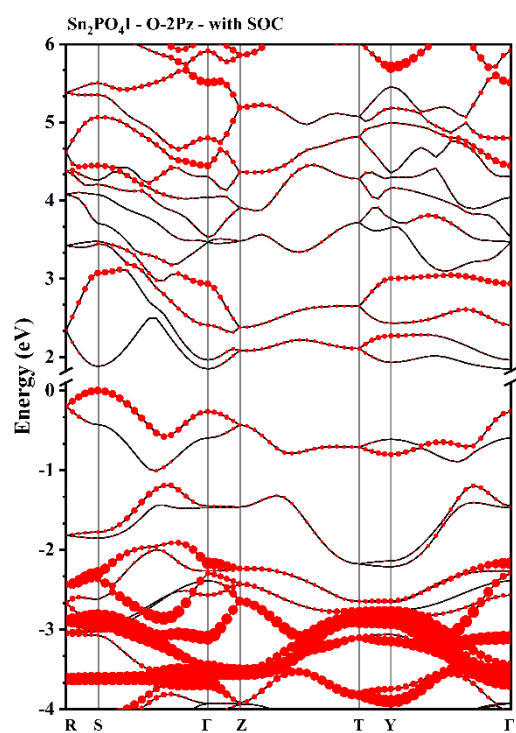



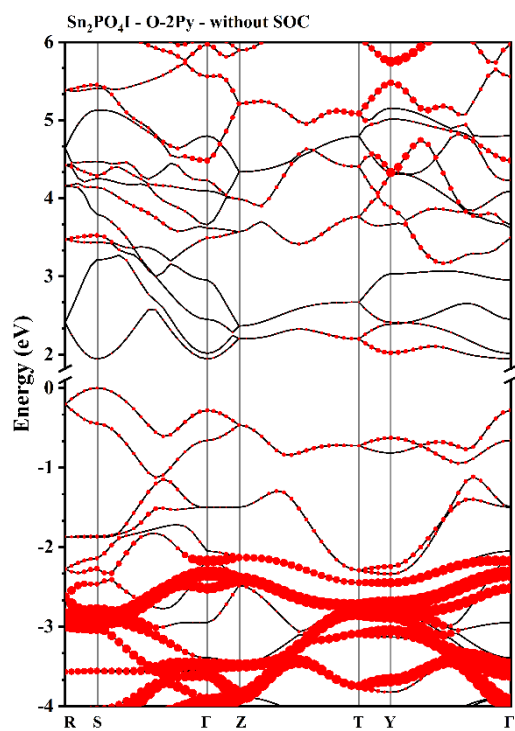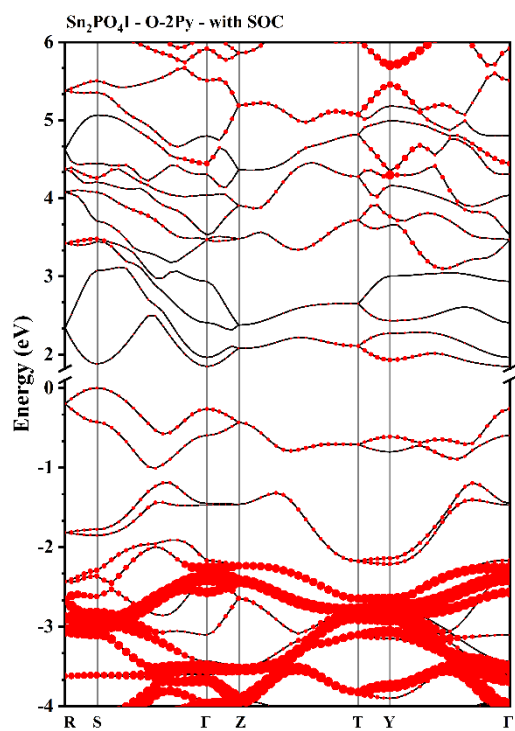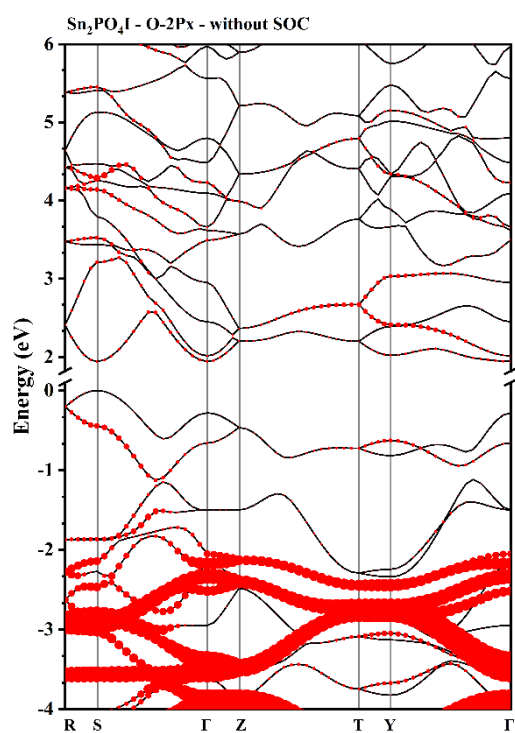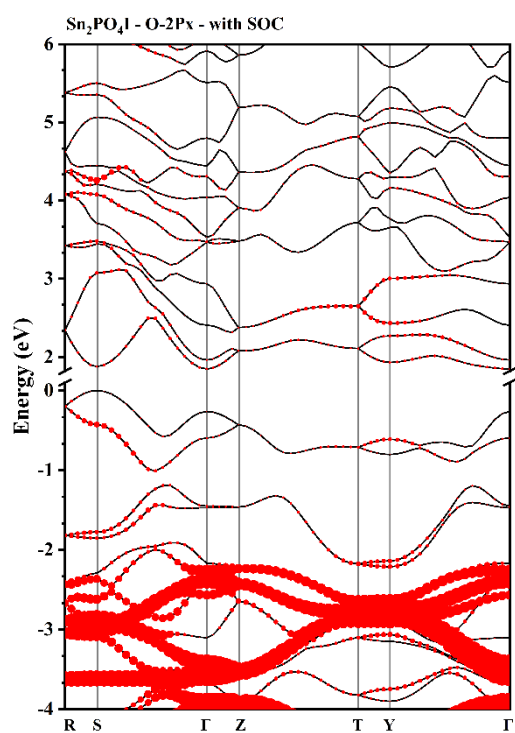

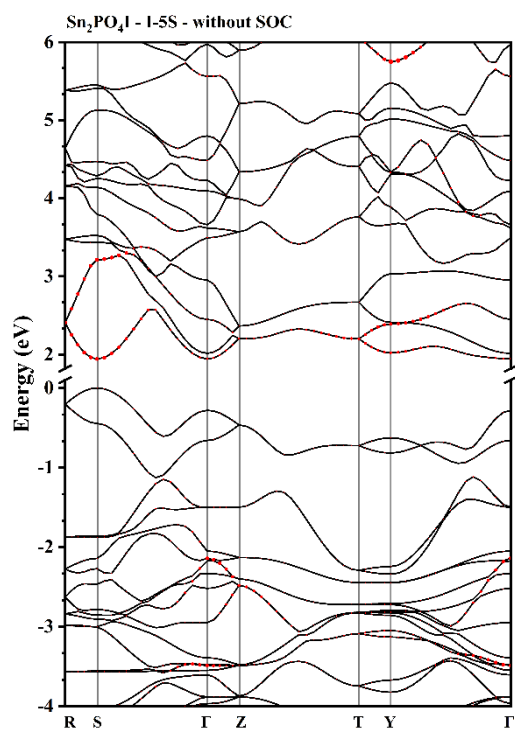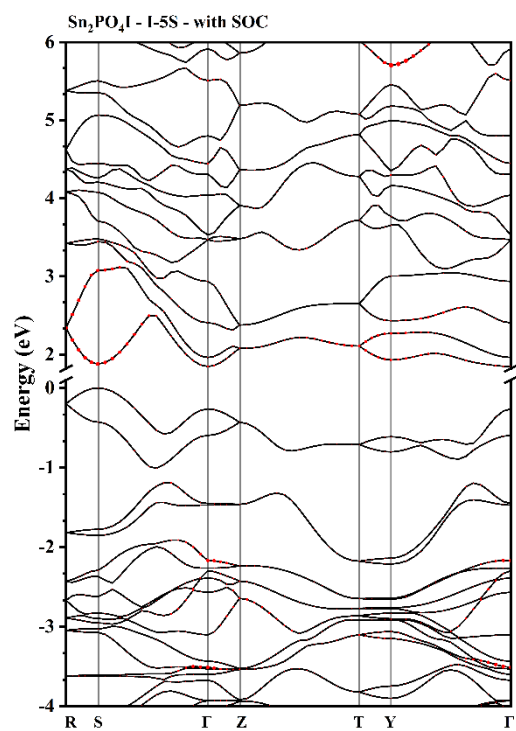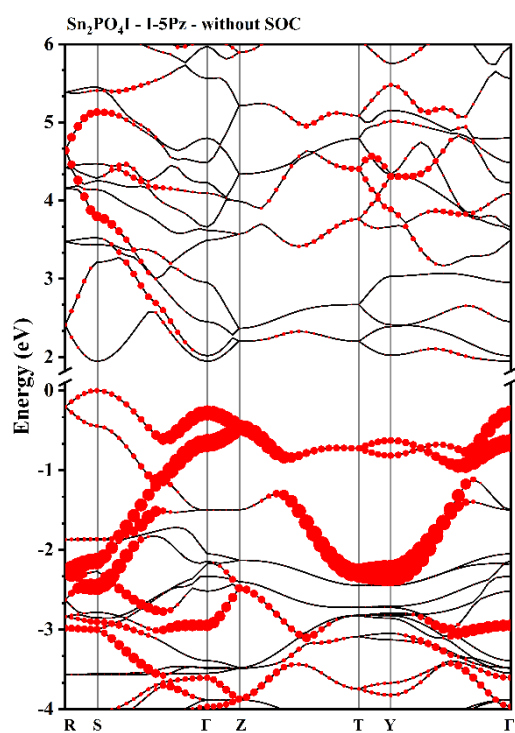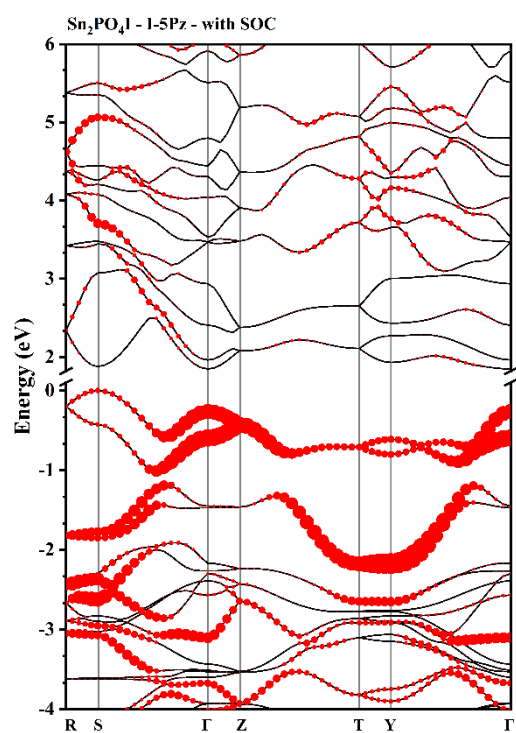

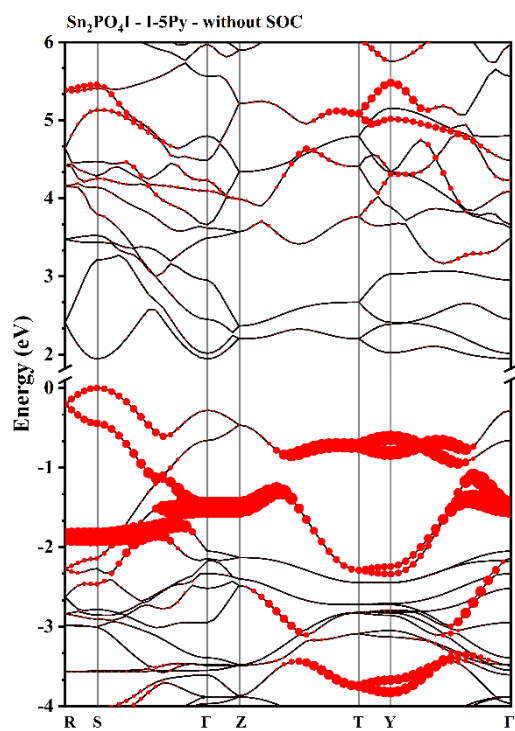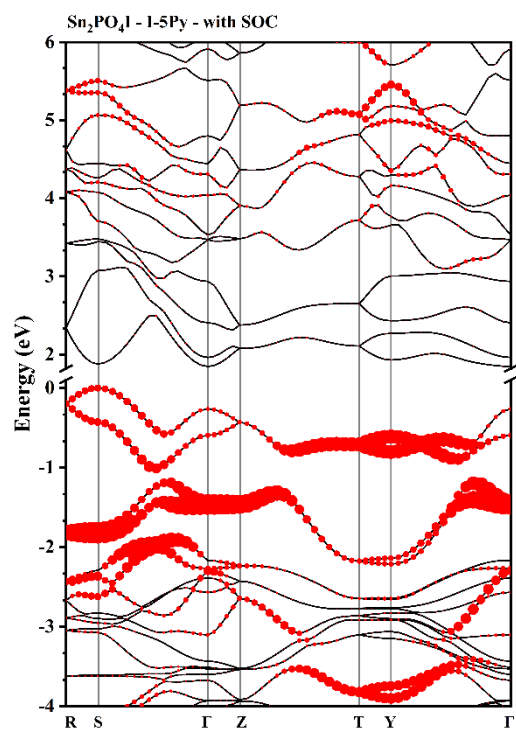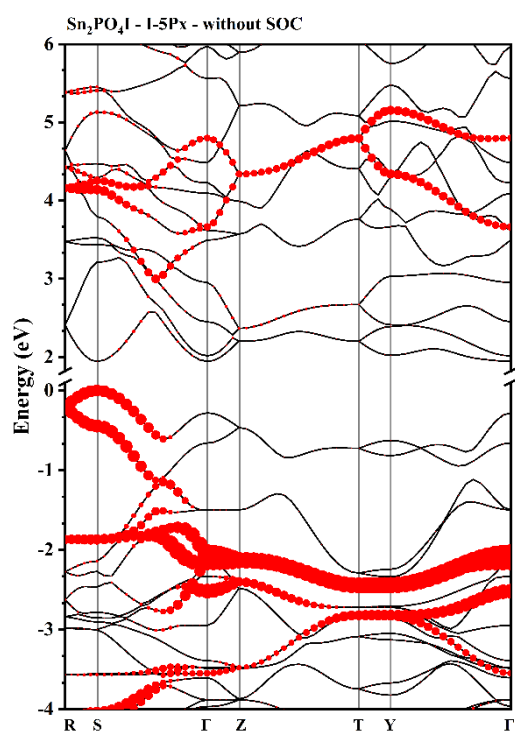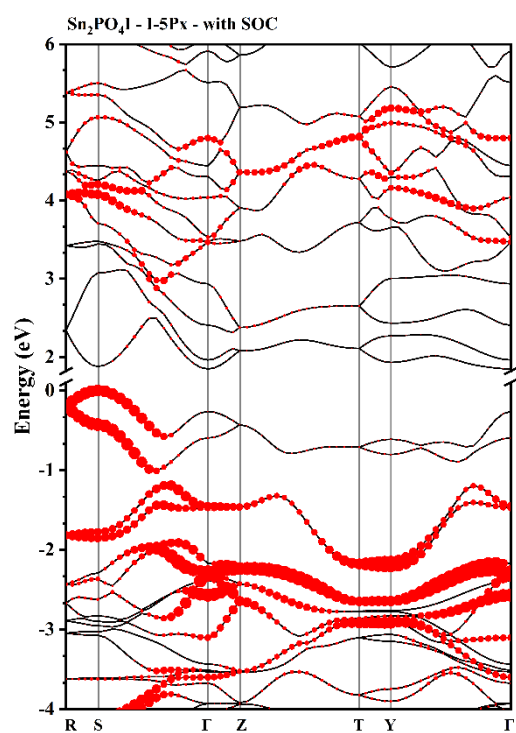

Figure S5. The band structure of  $\text{Ba}_2\text{PO}_4\text{I}$  and  $\text{Sr}_2\text{PO}_4\text{I}$  without spin-orbit effects and with spin-orbit effects, within the energy range of -20 eV to 10 eV.

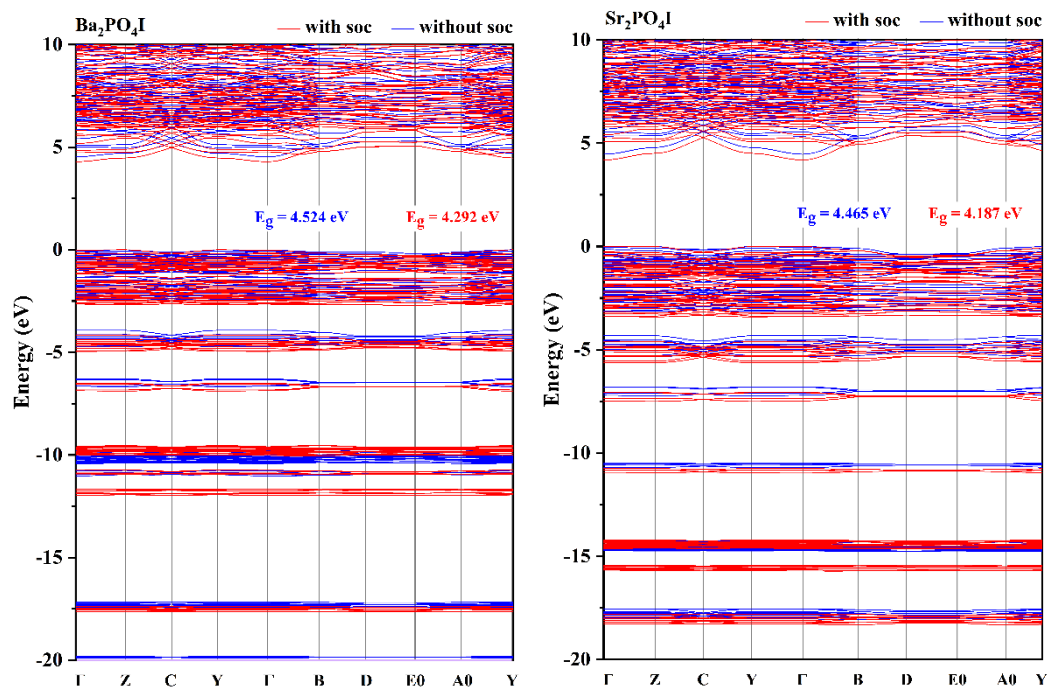

Figure S6. The projected band structure of  $\text{Ba}_2\text{PO}_4\text{I}$  along symmetry directions in the first Brillouin zone without (left panel) and with (right panel) spin-orbit effects.

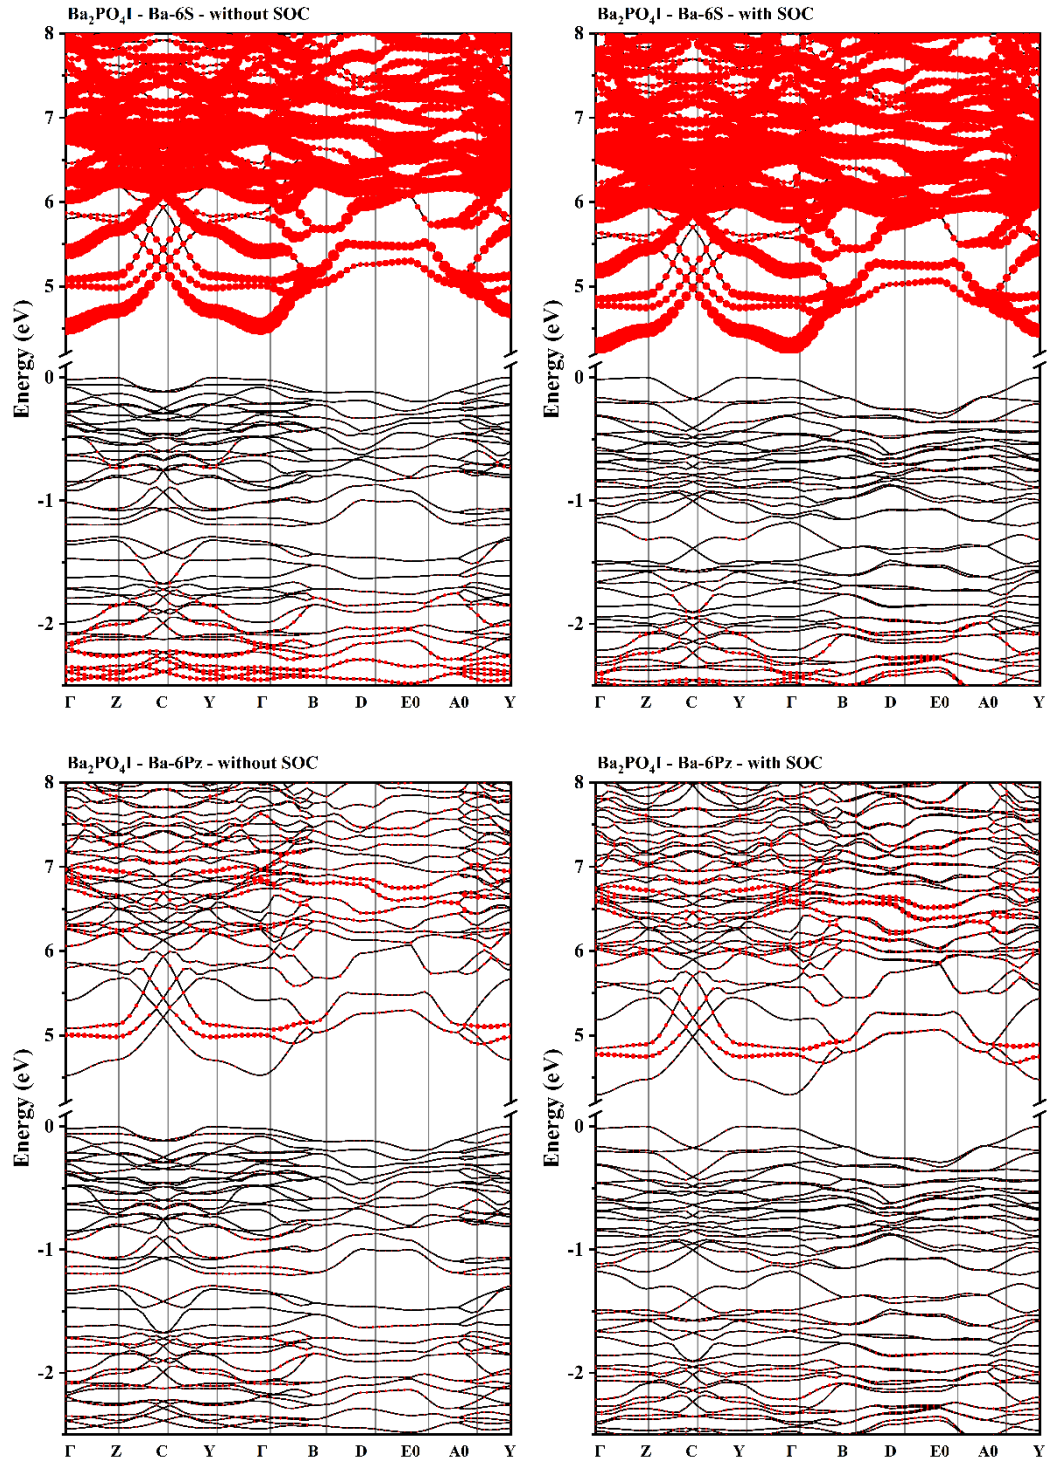

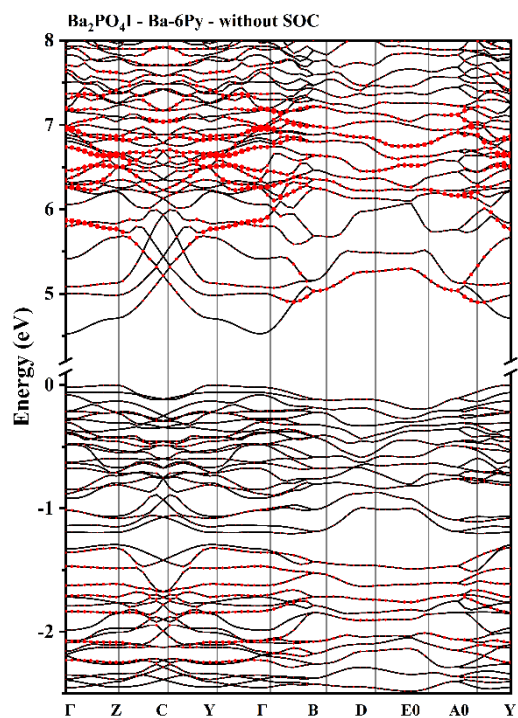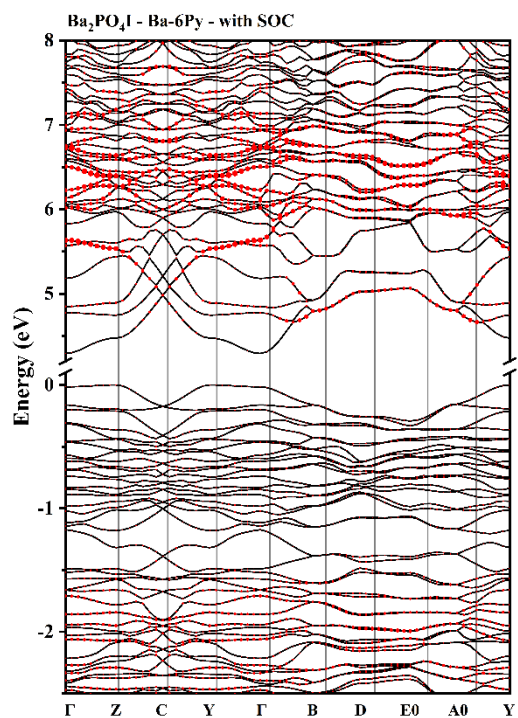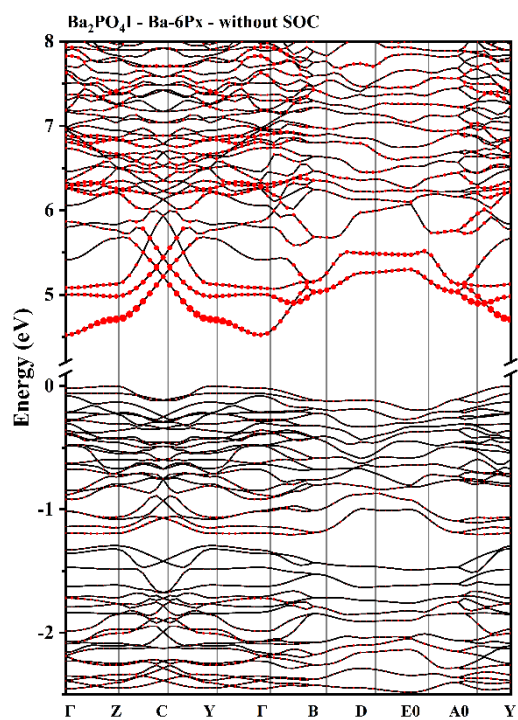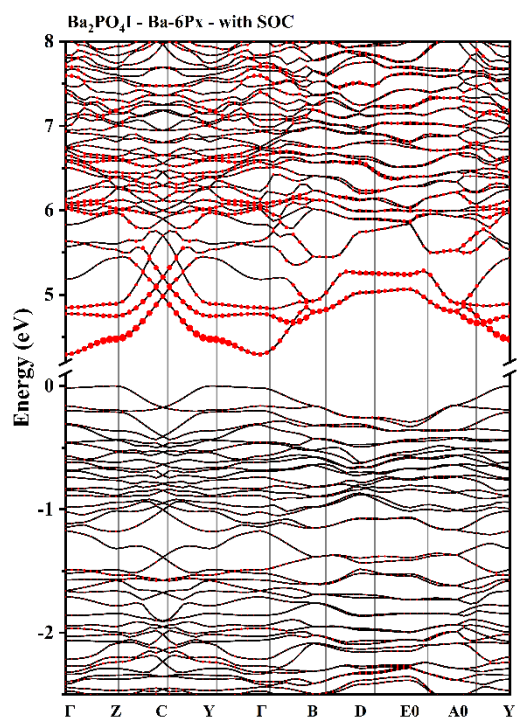



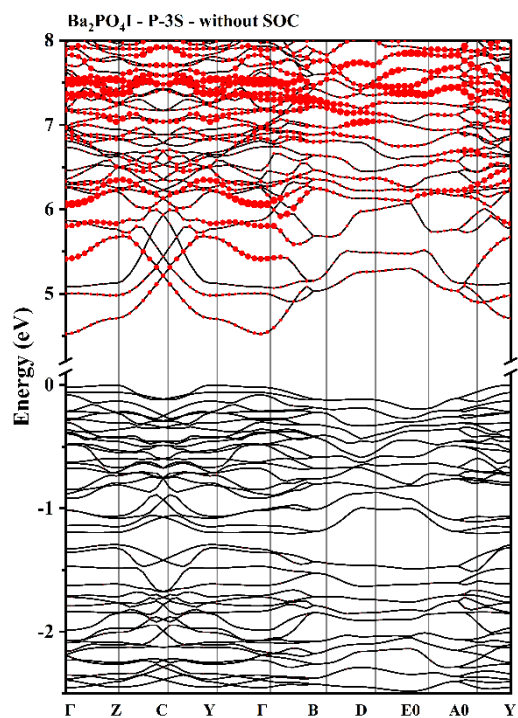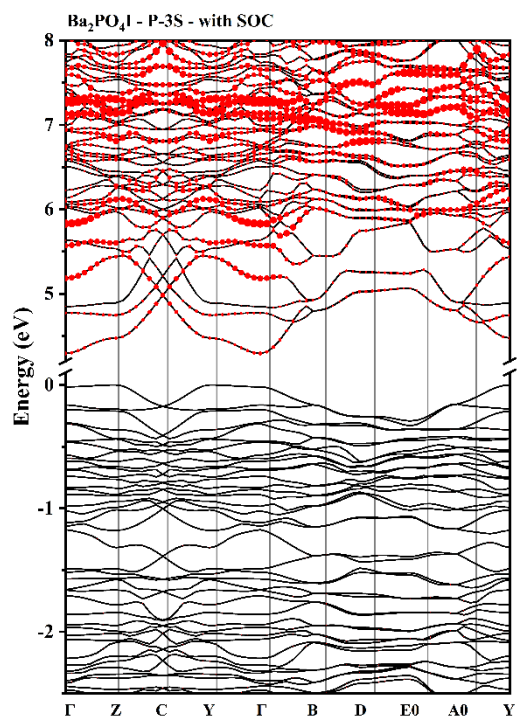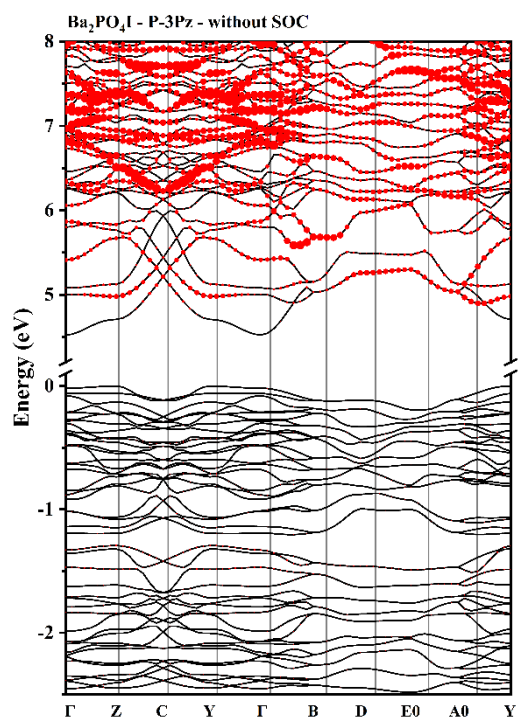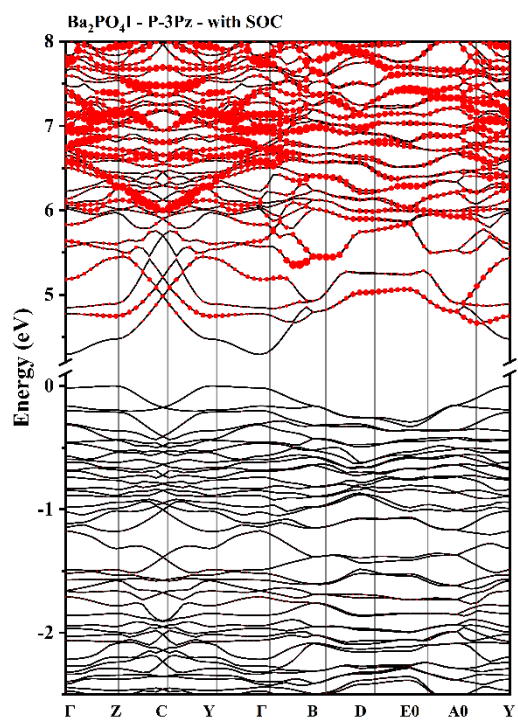

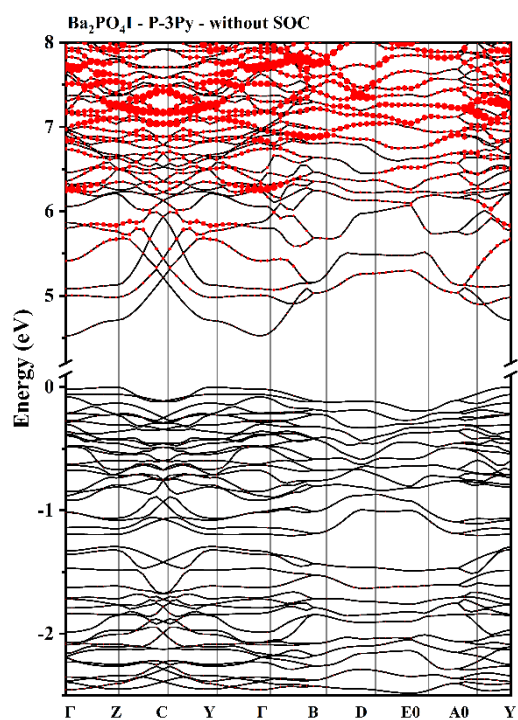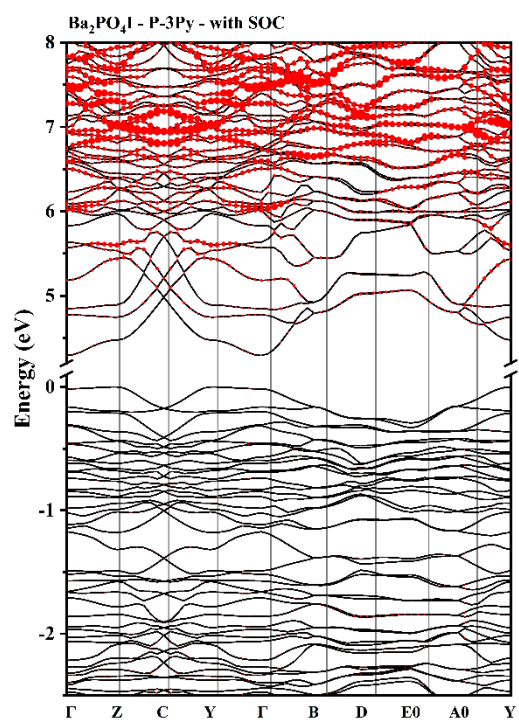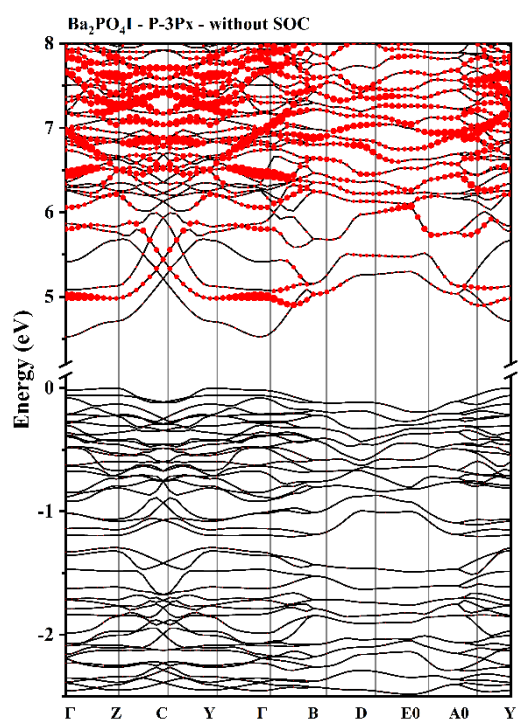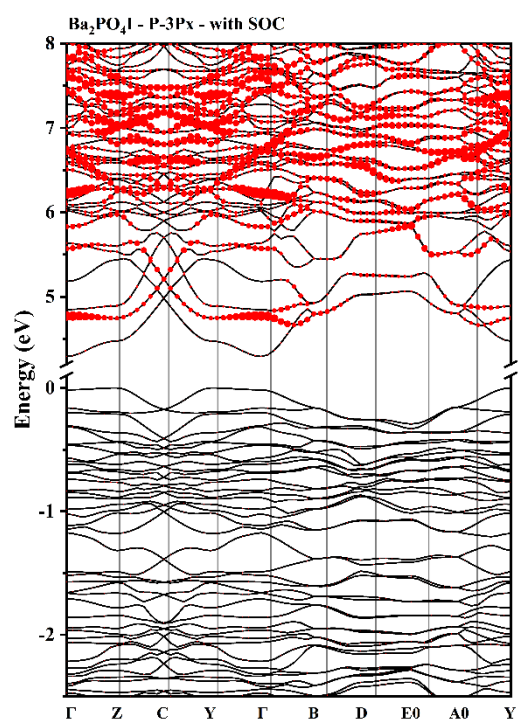

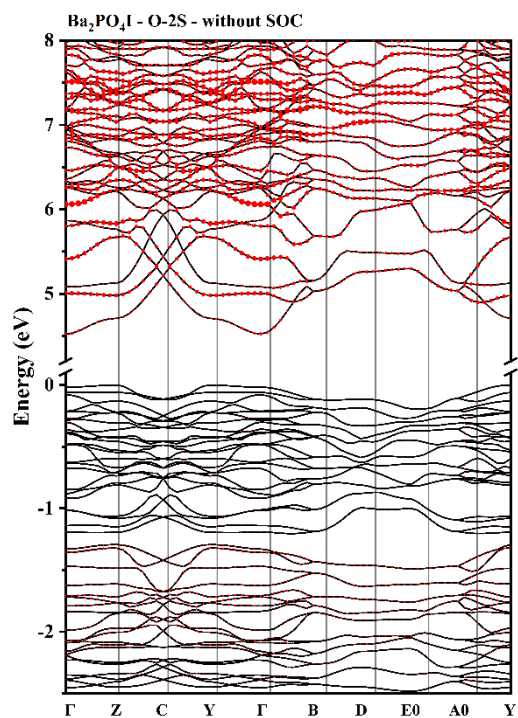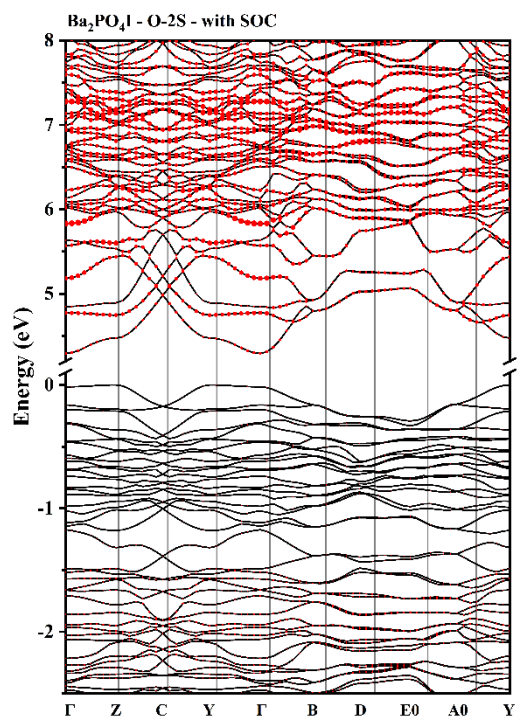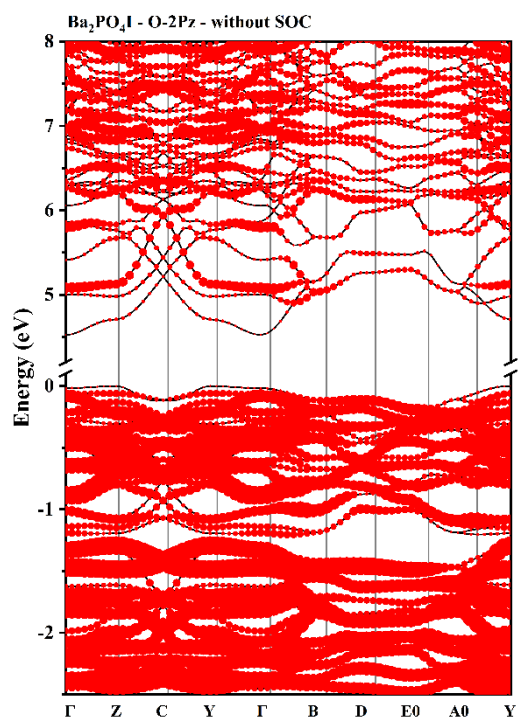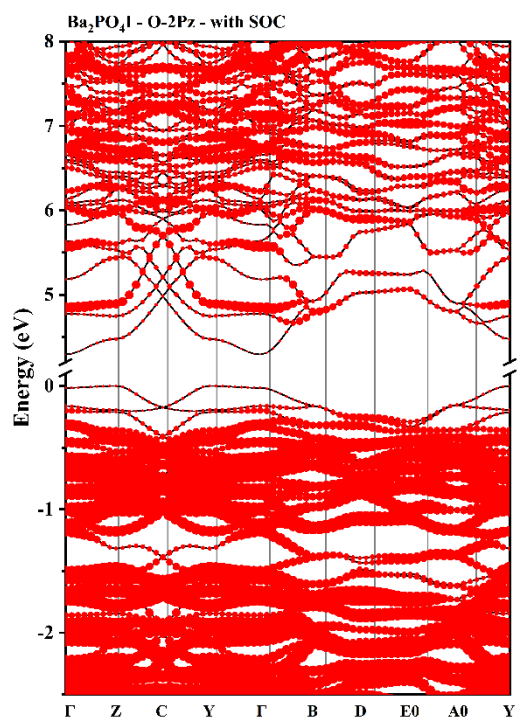

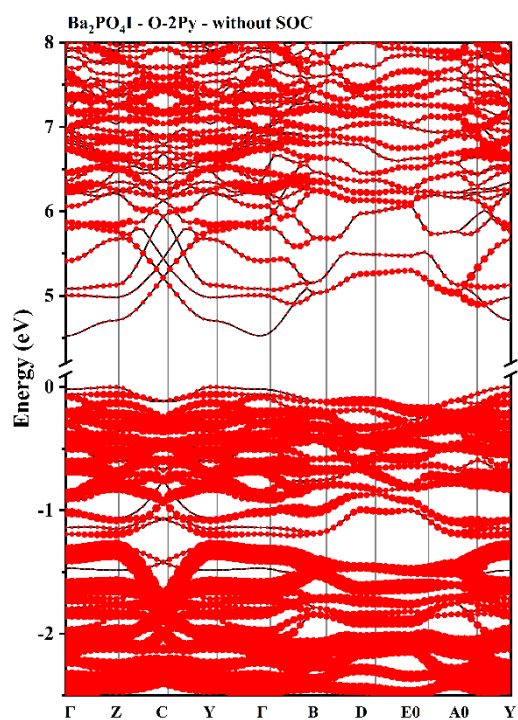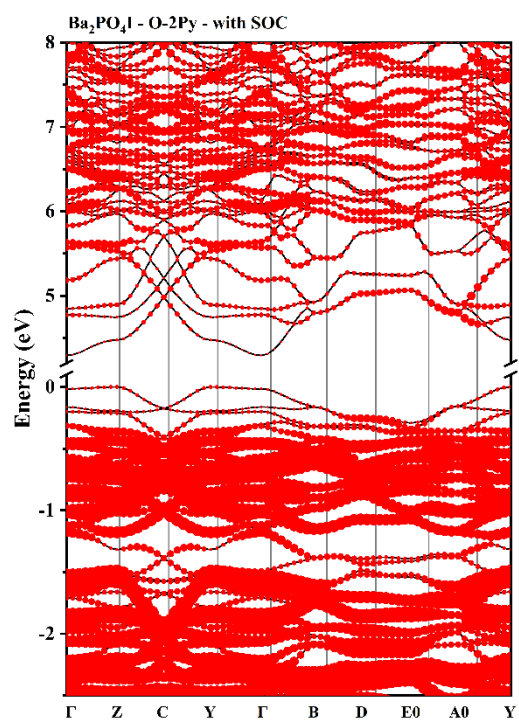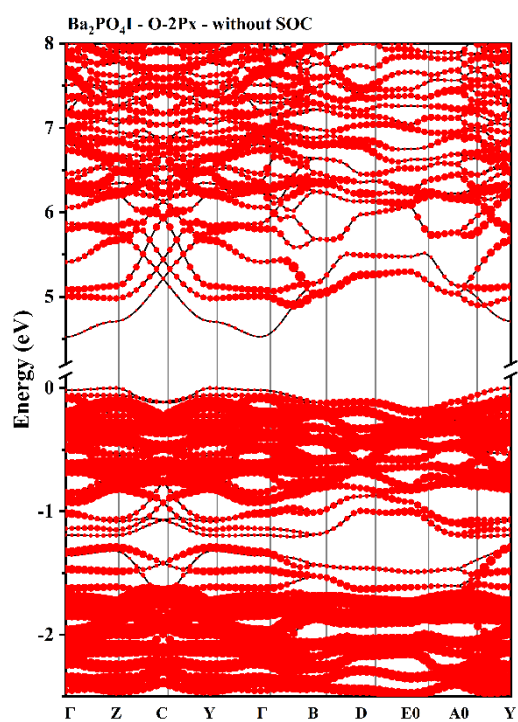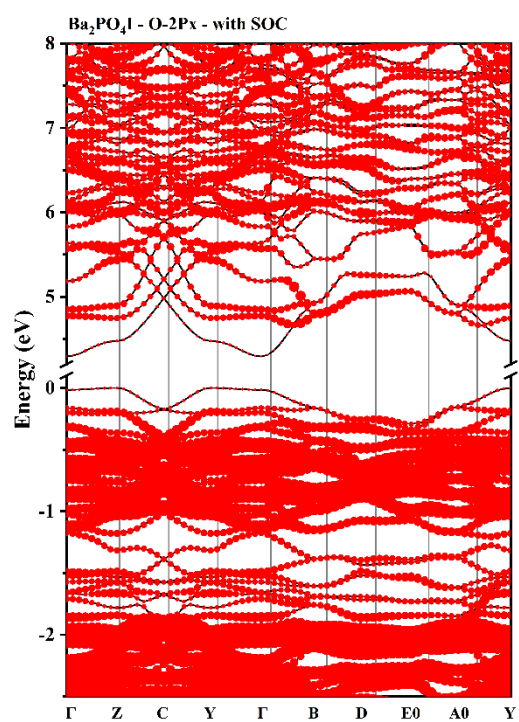



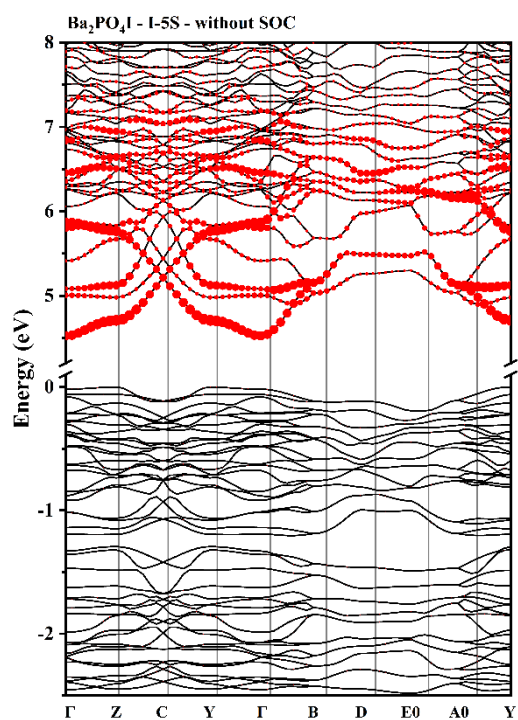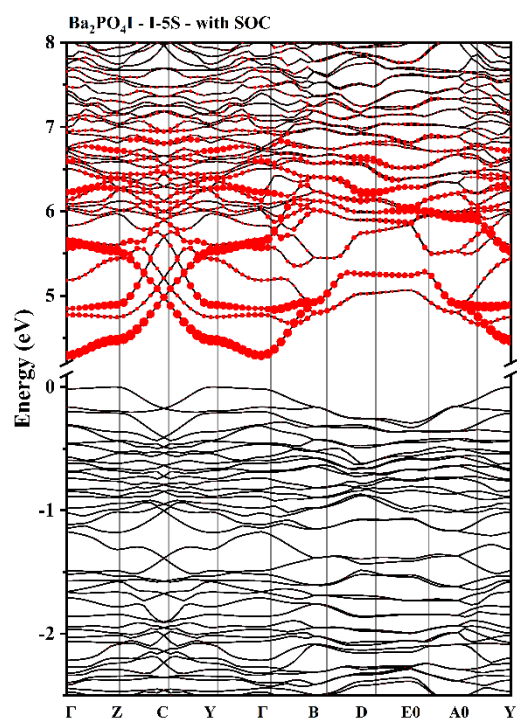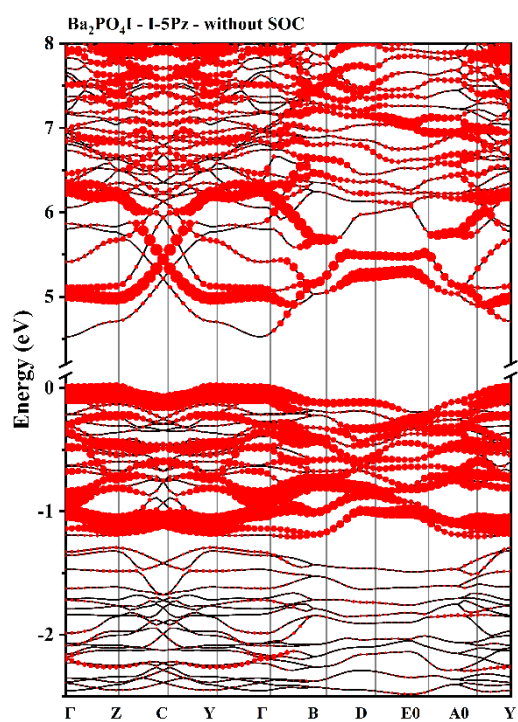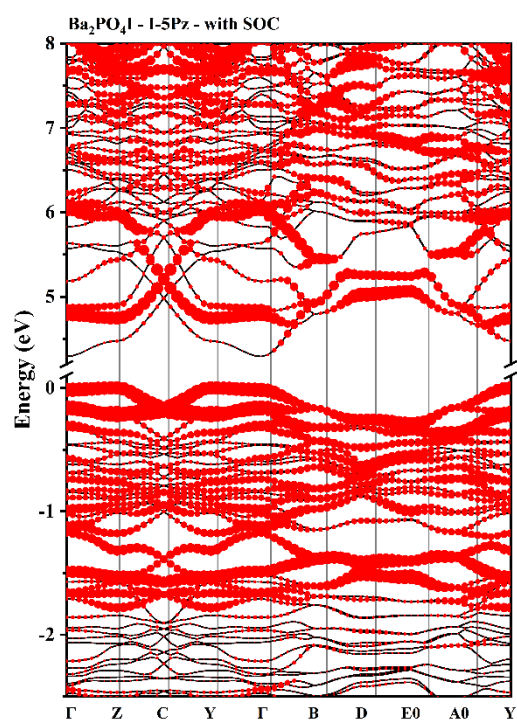

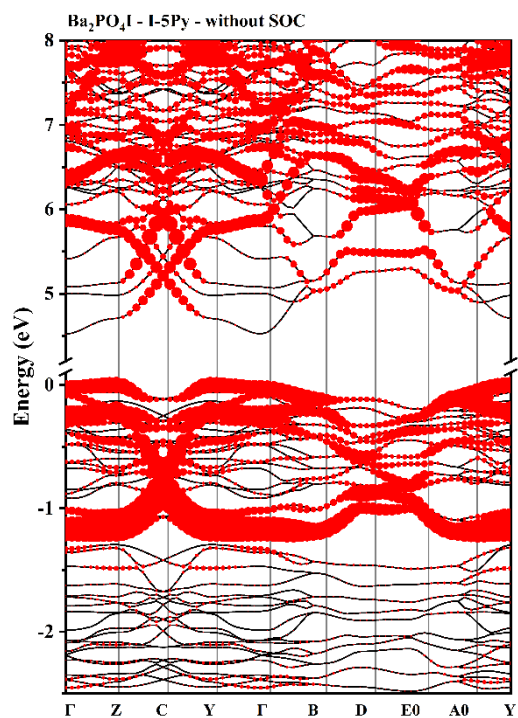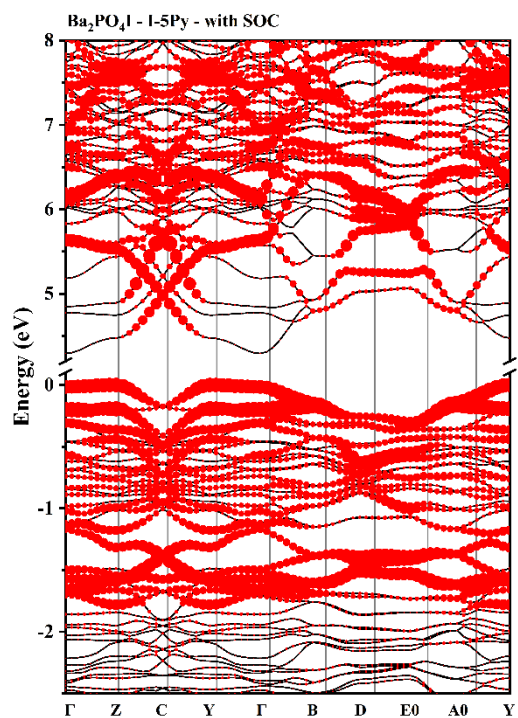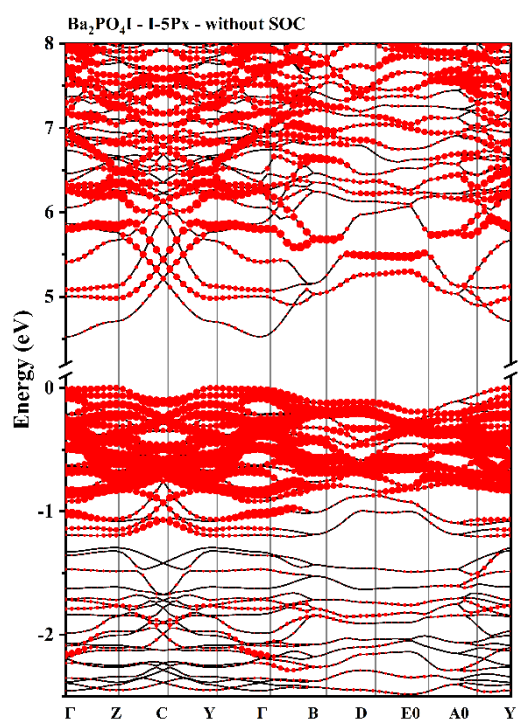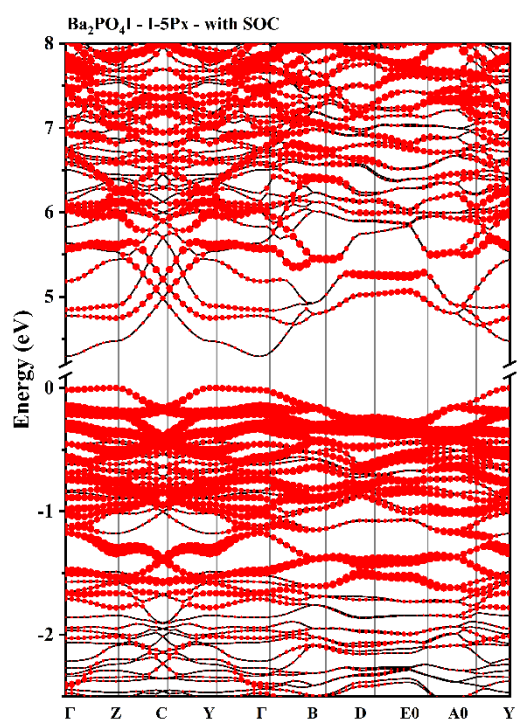



Figure S7. The projected band structure of  $\text{Sr}_2\text{PO}_4\text{I}$  along symmetry directions in the first Brillouin zone without (left panel) and with (right panel) spin-orbit effects.

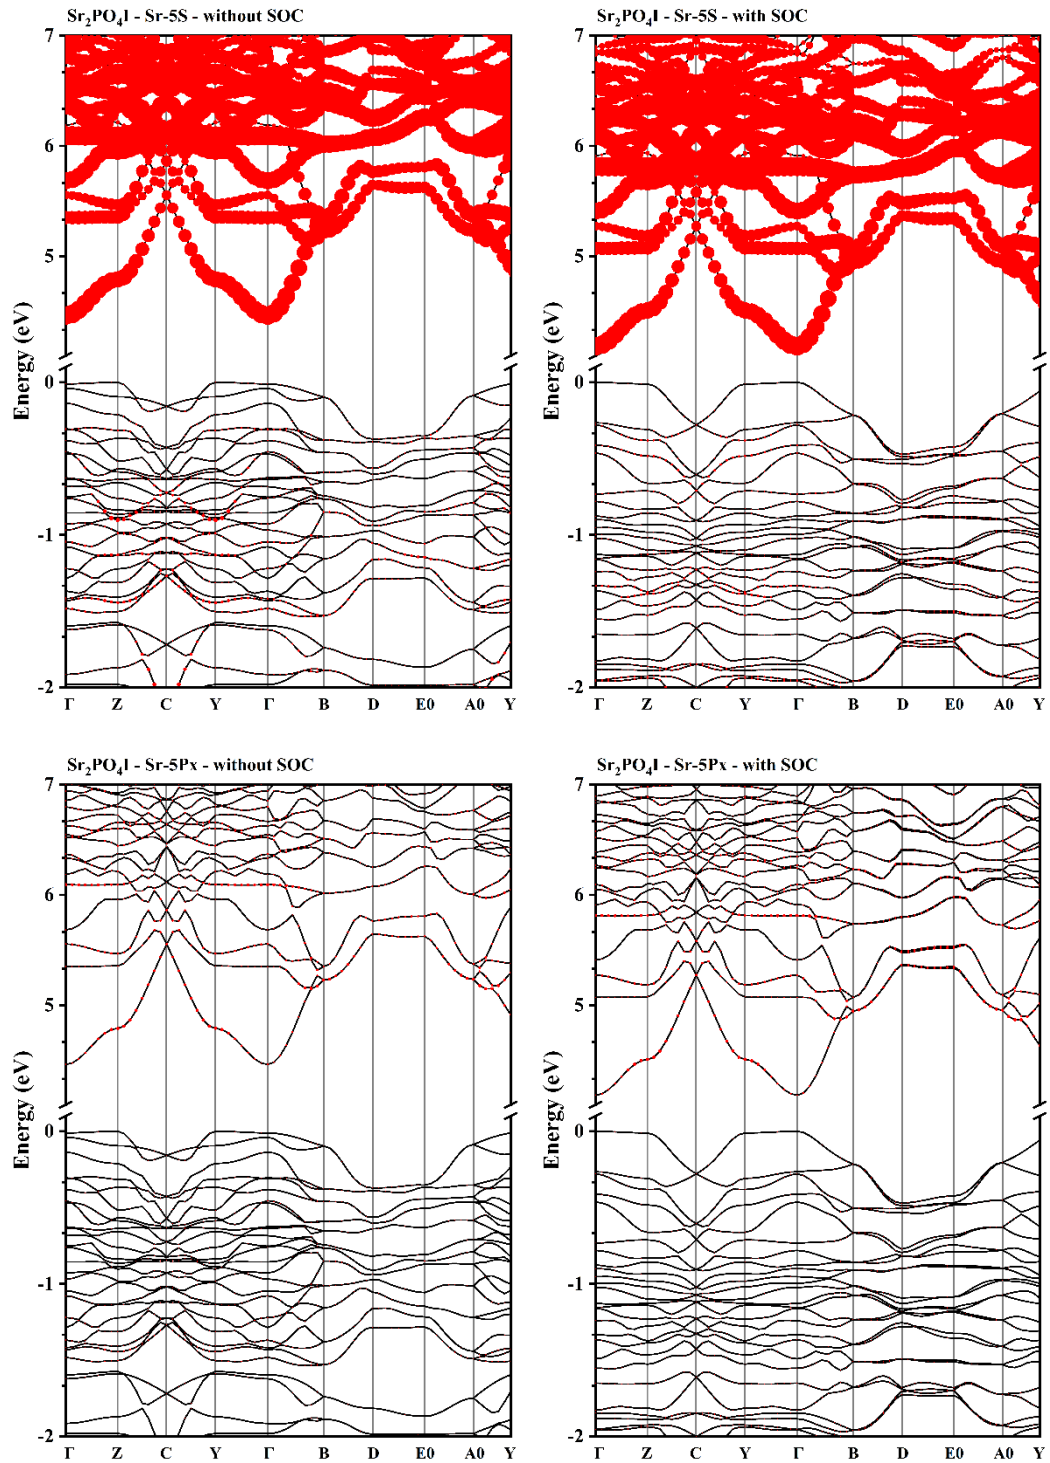

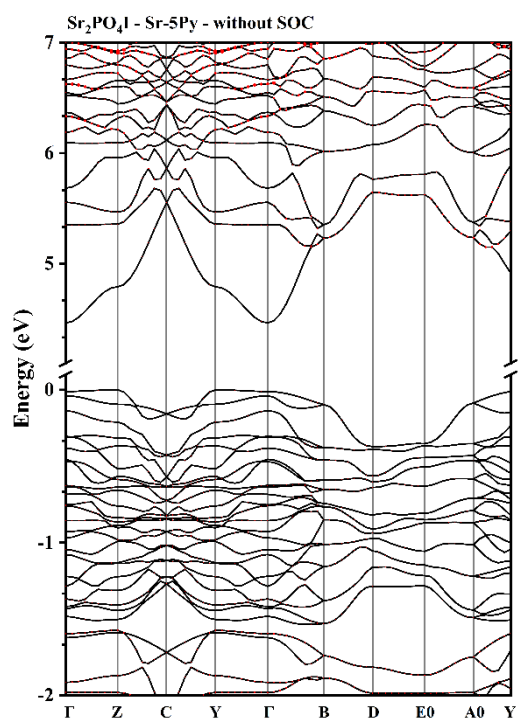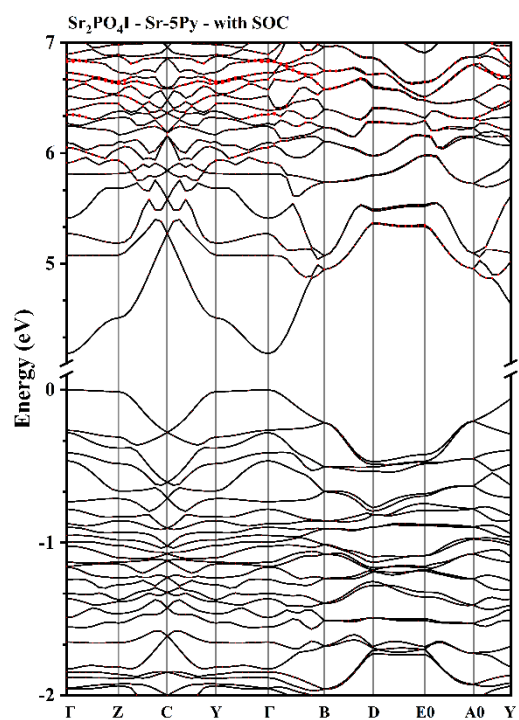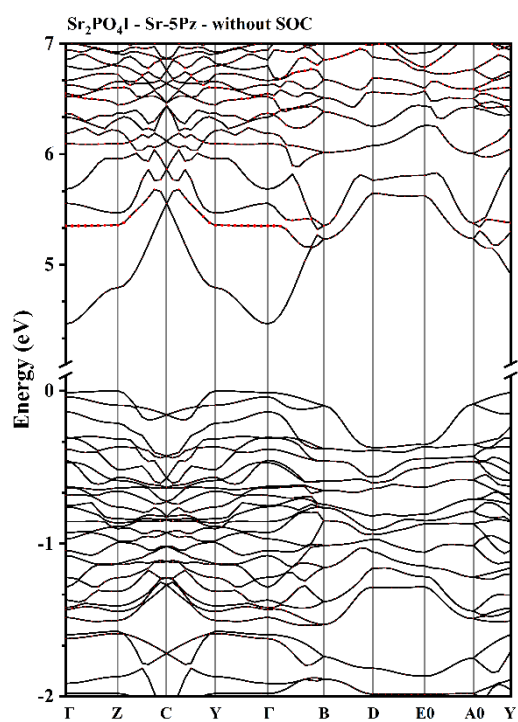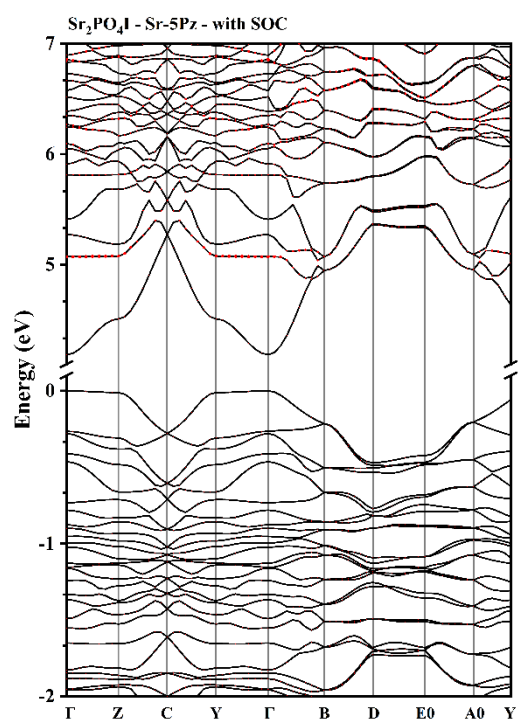

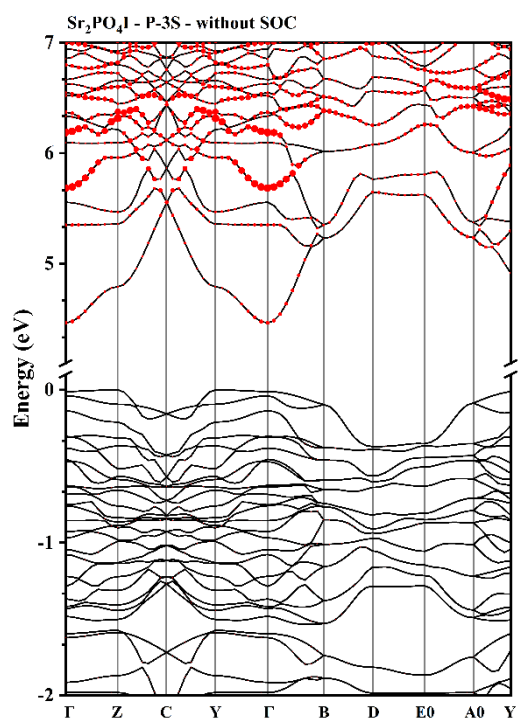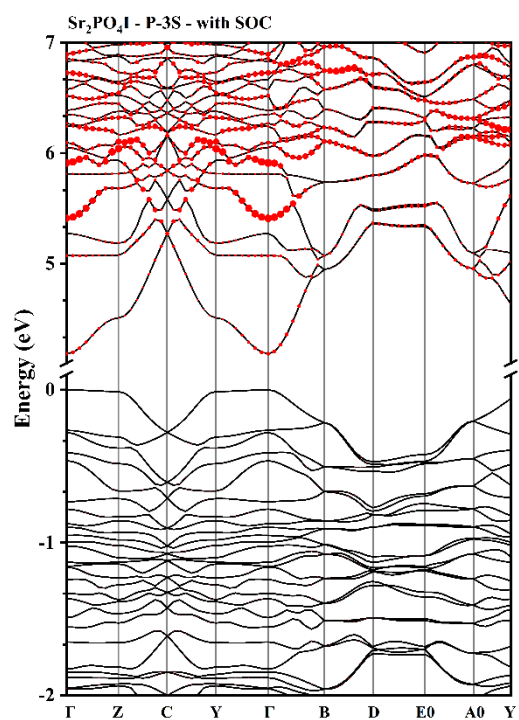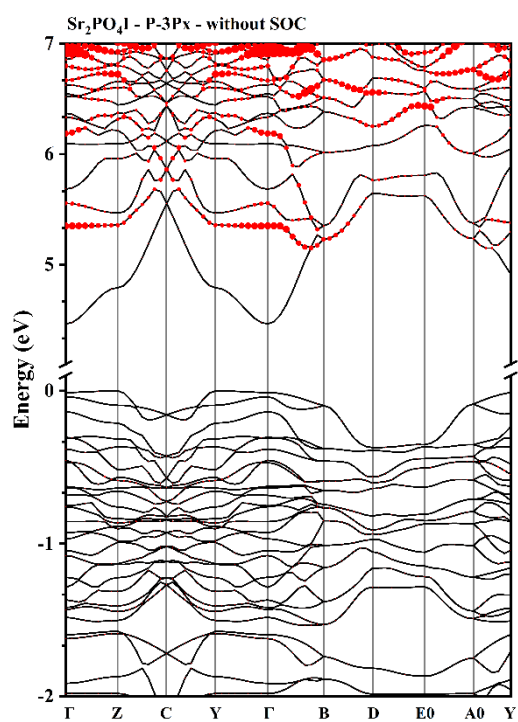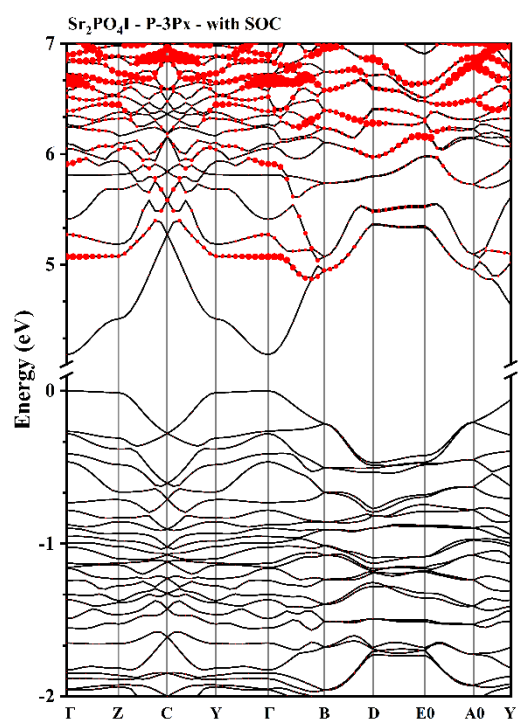

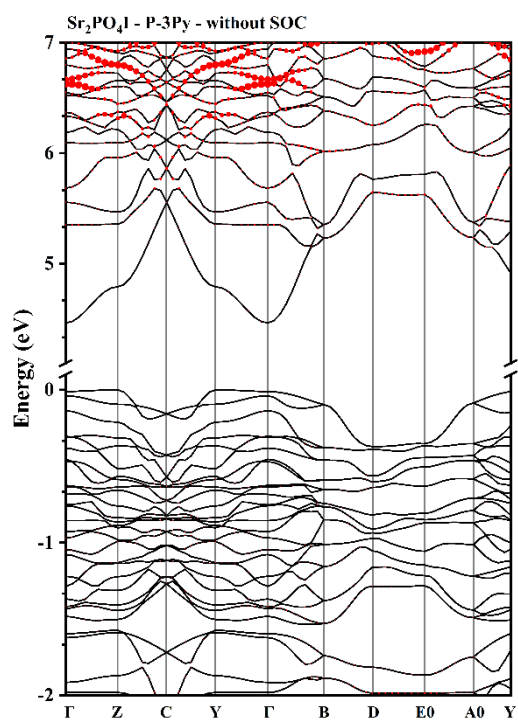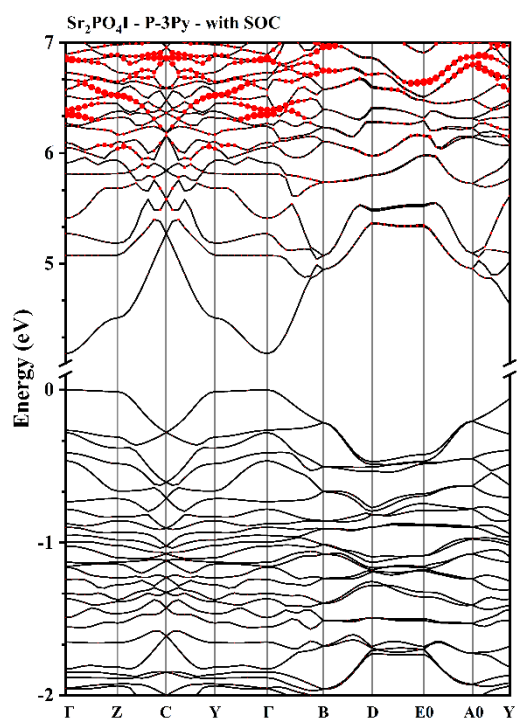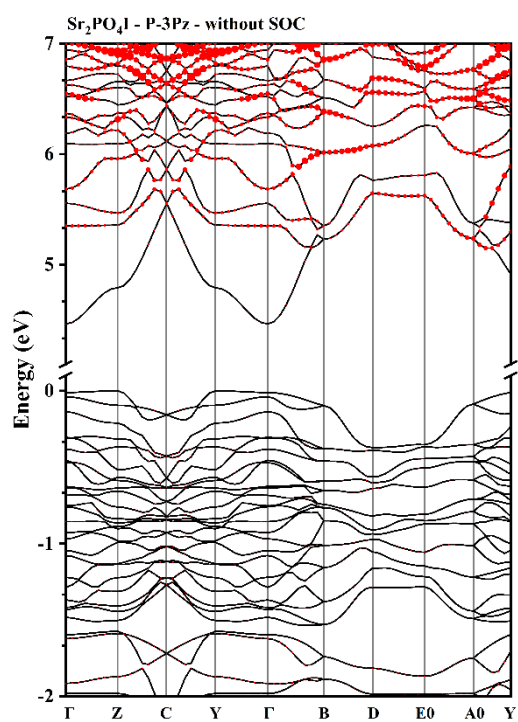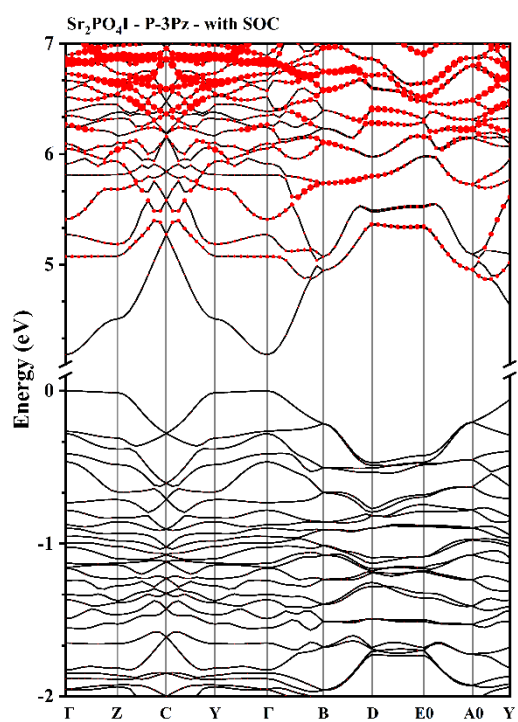

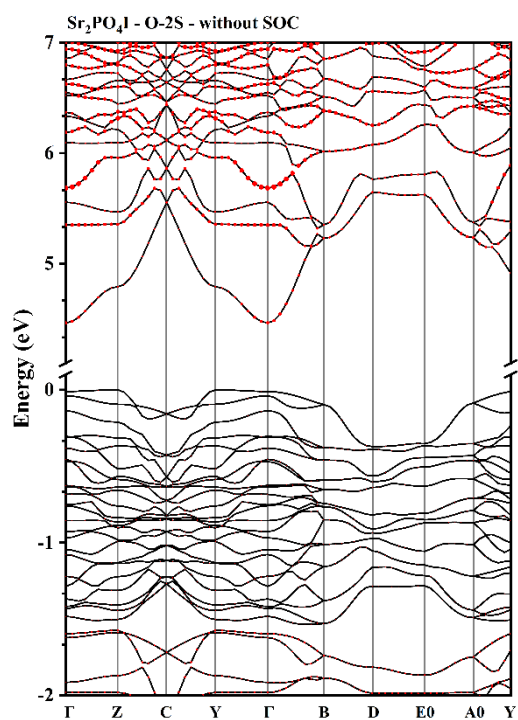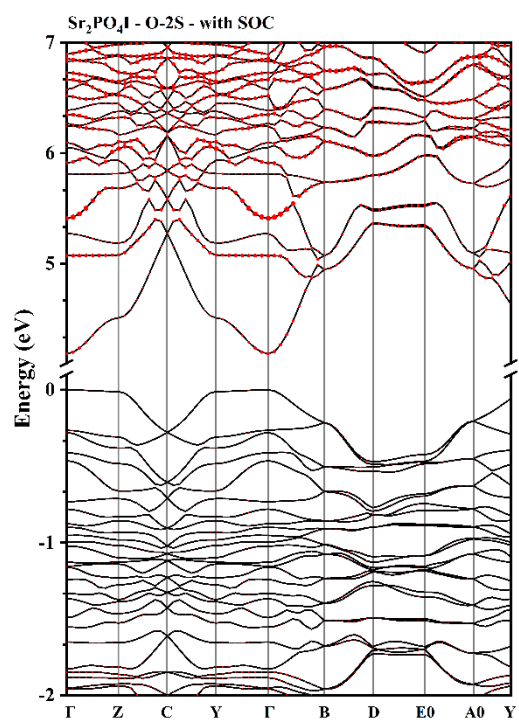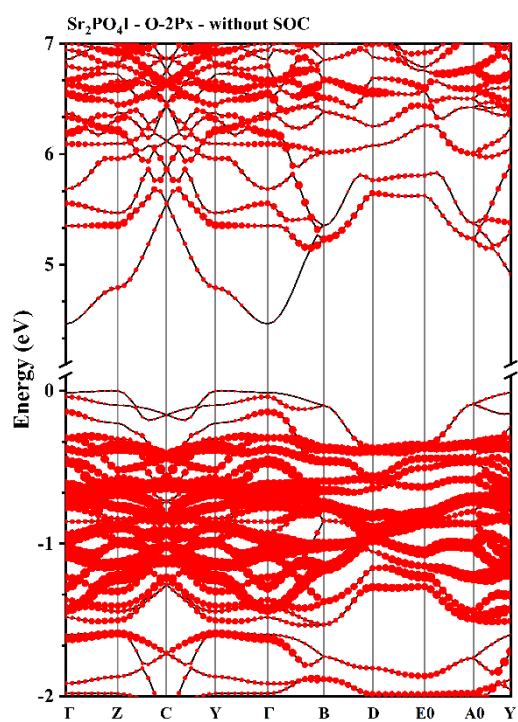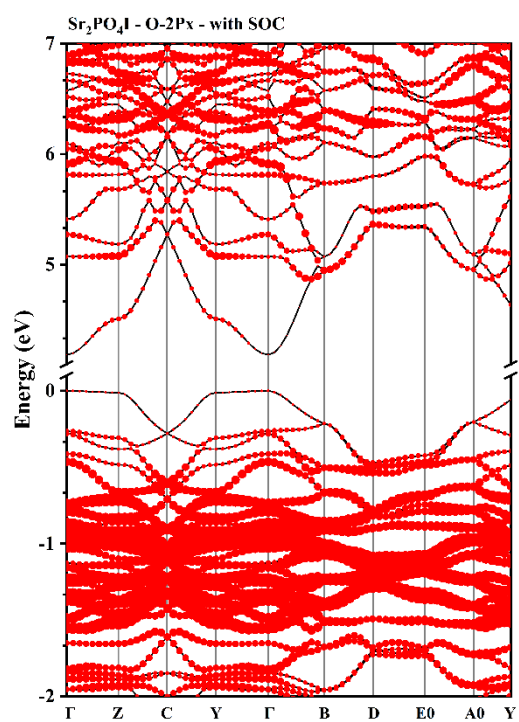



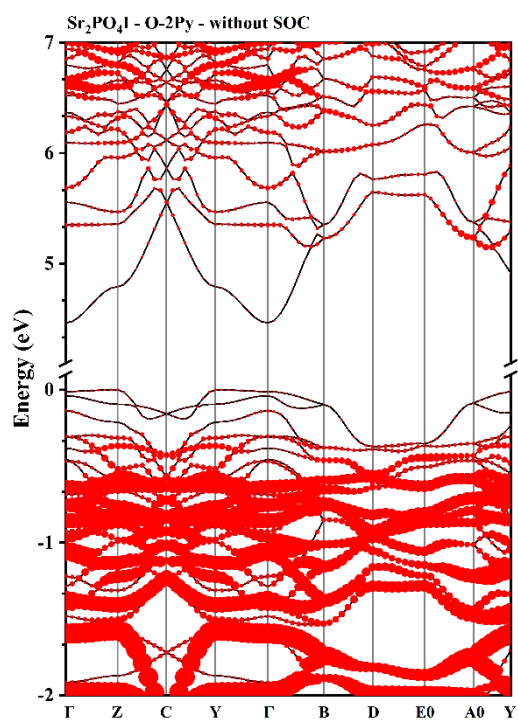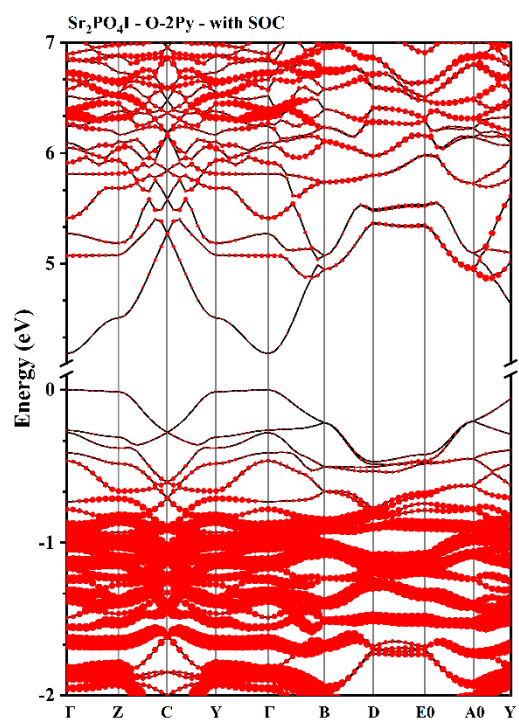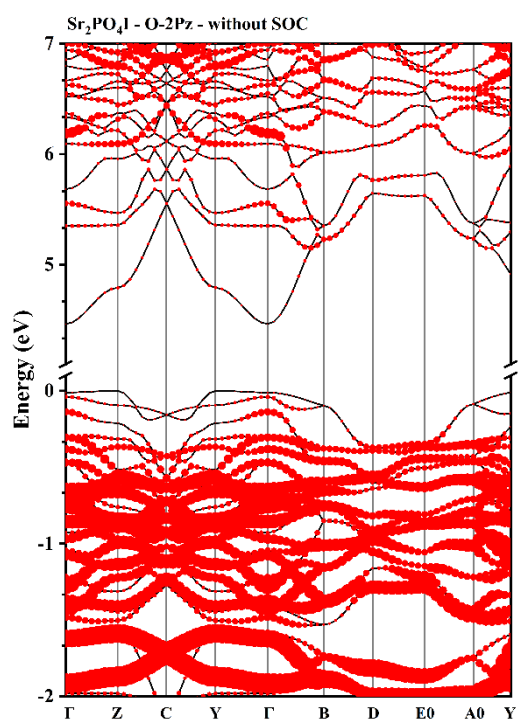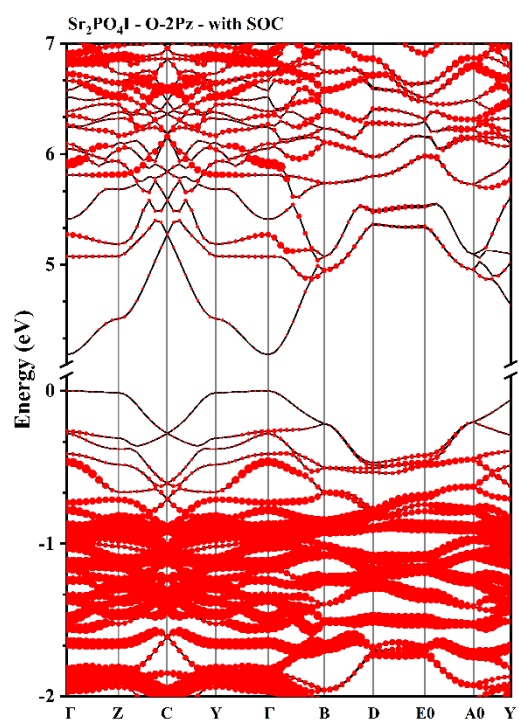

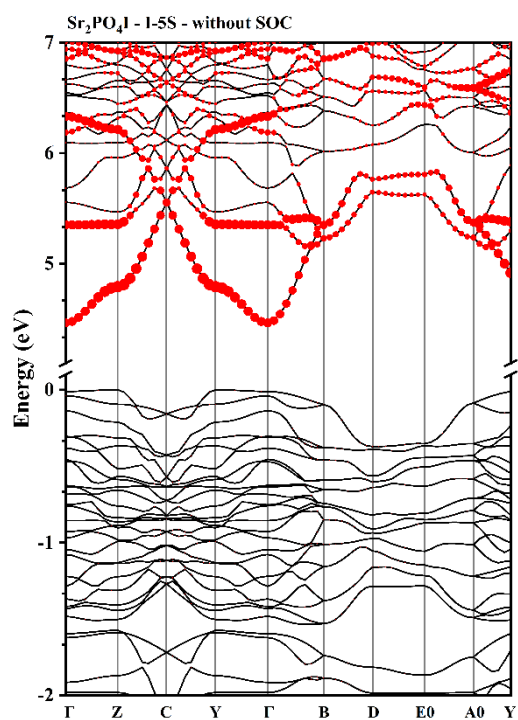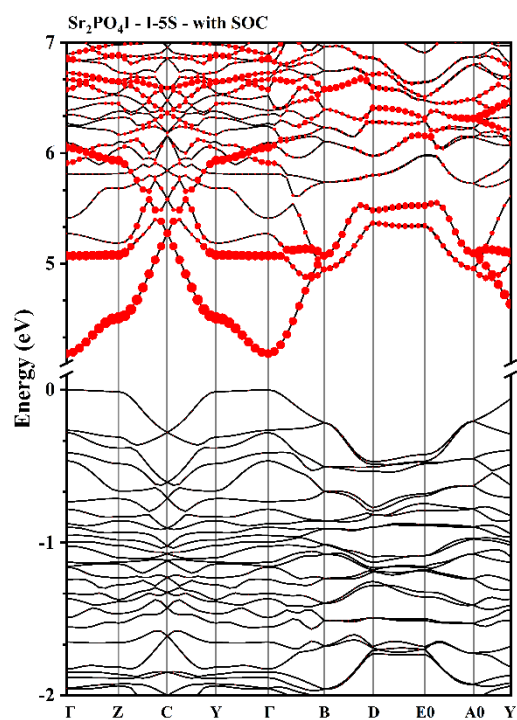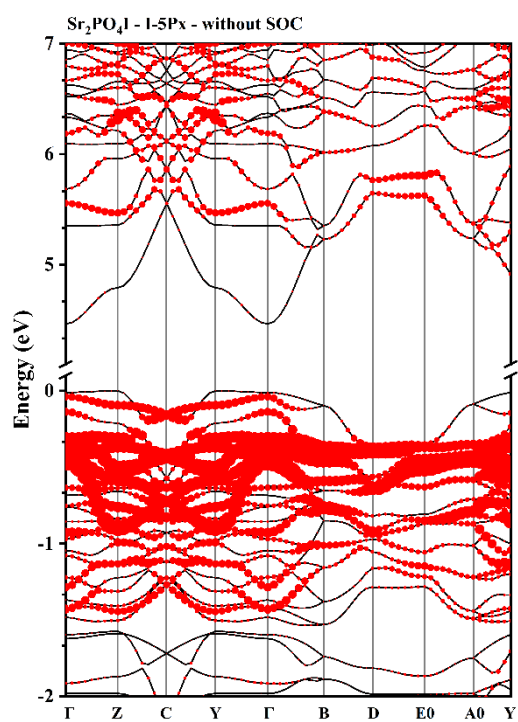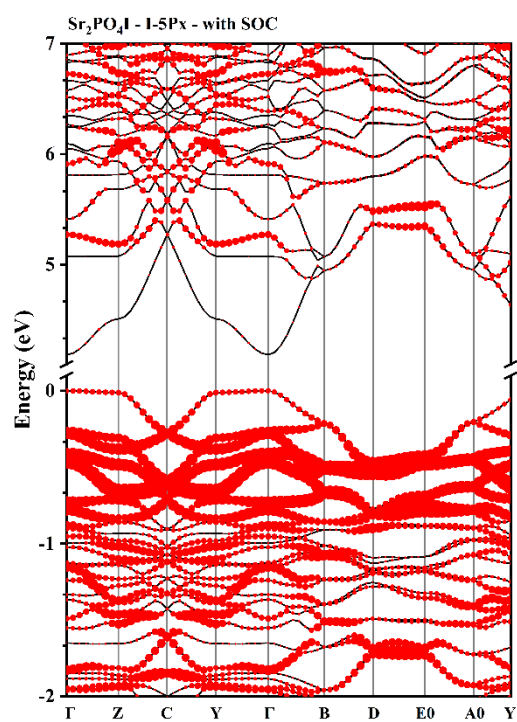

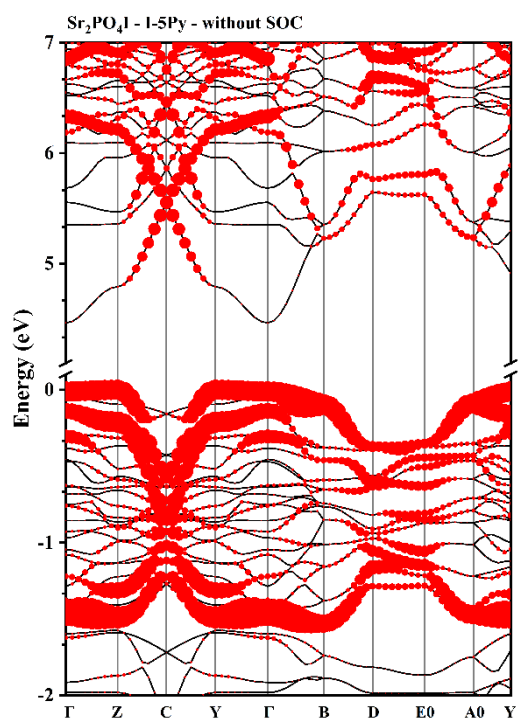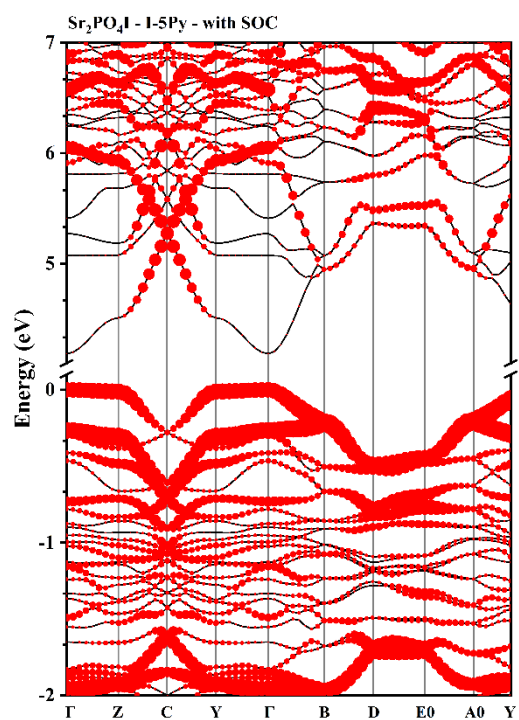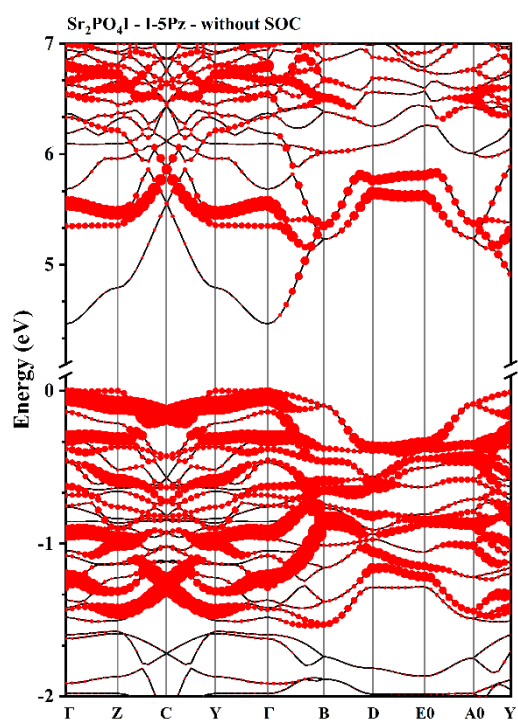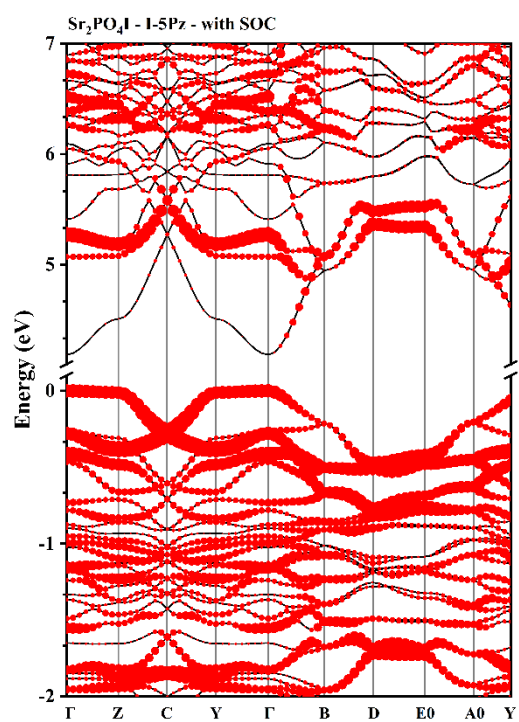

Supplement: s1 [file s1]
